# Supplementary material
Source: PubMed Central journal article supplement (PMC10549208)
Supplement: ofad457_supplementary_data.pdf [file ofad457_supplementary_data.pdf]

## Supplement to:

### **'Effectiveness of an mRNA vaccine booster dose against COVID-19 among U.S. healthcare personnel, October 2021–July 2022**

|                                                                                                                                                                                                                                                                                       |    |
|---------------------------------------------------------------------------------------------------------------------------------------------------------------------------------------------------------------------------------------------------------------------------------------|----|
| Supplementary Methods:.....                                                                                                                                                                                                                                                           | 3  |
| Box S1: Occupational groups included in the definition of healthcare personnel in the study, by anticipated level of direct patient contact .....                                                                                                                                     | 5  |
| Box S2: COVID-19–like symptoms defined for analysis purposes.....                                                                                                                                                                                                                     | 6  |
| Supplementary Table 1: Categorization of underlying health conditions and pregnancy among U.S. healthcare personnel.....                                                                                                                                                              | 7  |
| Supplementary Figure 1: Inclusion of U.S. healthcare personnel in analyses comparing different vaccine schedules .....                                                                                                                                                                | 8  |
| .....                                                                                                                                                                                                                                                                                 | 8  |
| Supplementary Table 2: States of participating health facilities for case- and control-participants included in the primary and supportive analyses of mRNA COVID-19 vaccine effectiveness among U.S. healthcare personnel.....                                                       | 9  |
| Supplementary Figure 2: Year and month of 2 <sup>nd</sup> mRNA COVID-19 vaccine dose among U.S. healthcare personnel, by whether received a booster dose or only two doses .....                                                                                                      | 10 |
| Supplementary Figure 3: Year and month of an mRNA COVID-19 vaccine booster dose among U.S. healthcare personnel.....                                                                                                                                                                  | 10 |
| Supplementary Figure 4: Year and month of SARS-CoV-2 test among U.S. healthcare personnel, by whether received an mRNA COVID-19 booster dose or only the primary series of two doses .....                                                                                            | 11 |
| Supplementary Table 3: Additional Characteristics of Healthcare Personnel with COVID-19 (Case-participants) or who tested negative for SARS-CoV-2 (Control-participants) at 24 U.S. Sites, October 2021–July 2022 .....                                                               | 12 |
| Supplementary Table 4: Characteristics of healthcare personnel who received a second COVID-19 mRNA vaccine dose by whether an mRNA booster dose was also received at 24 U.S. Sites, October 2021–July 2022                                                                            | 13 |
| Supplementary Table 5: Characteristics of healthcare personnel tested during the Delta-predominant period or during the Omicron-predominant period at 24 U.S. Sites, October 2021–July 2022 .....                                                                                     | 14 |
| Supplementary Table 6: Characteristics of Healthcare Personnel with COVID-19 (Case-participants) or who tested negative for SARS-CoV-2 (Control-participants) at 24 U.S. Sites, October 2021–July 2022 (subset of participants who received a booster dose or were unvaccinated)..... | 15 |
| Supplementary Table 7: Characteristics of Healthcare Personnel with COVID-19 (Case Participants) or who tested negative for SARS-CoV-2 (Control Participants) at 24 U.S. Sites, January 2021–July 2022 (subset of participants who received two doses or were unvaccinated) .....     | 16 |

|                                                                                                                                                                                                                                                                        |    |
|------------------------------------------------------------------------------------------------------------------------------------------------------------------------------------------------------------------------------------------------------------------------|----|
| Supplementary Table 8: Estimated Vaccine Effectiveness of an mRNA booster dose against COVID-19 among U.S. healthcare personnel who received two mRNA doses, by variant-predominant period, October 2021–July 2022 (including unadjusted and adjusted estimates) ..... | 17 |
| Supplementary Table 9: Estimated Effectiveness of mRNA vaccines against COVID-19 among U.S. healthcare personnel who received two mRNA doses by variant-predominant period, October 2021–July 2022, using <i>conditional</i> logistic regression .....                 | 18 |
| Supplementary Table 10: Estimated Effectiveness of mRNA vaccines against COVID-19 among U.S. healthcare personnel who received two mRNA doses by variant-predominant period, October 2021–July 2022, using <i>unconditional</i> logistic regression .....              | 20 |
| Supplementary Table 11: Supportive analyses: Estimated Effectiveness of an mRNA Booster Dose against COVID-19 among U.S. healthcare personnel who received two mRNA doses using different models and by subgroup, October 2021–July 2022.....                          | 22 |
| Supplementary Table 12: Estimated vaccine effectiveness of an mRNA booster dose against COVID-19 among U.S. healthcare personnel compared with unvaccinated status, by variant-predominant period, October 2021–July 2022 .....                                        | 23 |
| Supplementary Table 13: Estimated effectiveness of a second mRNA dose against COVID-19 among U.S. healthcare personnel compared with unvaccinated status, by variant-predominant period, January–December, 2021 .....                                                  | 24 |
| Supplementary Table 14: Estimated effectiveness of a second mRNA dose against COVID-19 among U.S. healthcare personnel compared with unvaccinated status, by variant-predominant period, October 2021–July 2022 .....                                                  | 25 |
| Supplementary Table 15: Collaborators and other team members acknowledged by site.....                                                                                                                                                                                 | 26 |

## **Supplementary Methods:**

### ***Participants with multiple test results***

Participants were only eligible for inclusion if there was no known previous positive SARS-CoV-2 infection. For participants with multiple test results, the test date was derived from the earliest recent test result. For control-participants, re-enrollment was possible provided any symptoms had resolved at least 4 weeks previously. Additional details of the component of the study performed at PREVENT sites, including the study protocol and forms, is available at: <https://medicine.uiowa.edu/content/preventing-emerging-infections-through-vaccine-effectiveness-testing-prevent-project> (accessed February 11 2023).

### ***Additional analyses of vaccine effectiveness***

To account for different recommendations for timing of a third vaccine dose among immunocompromised persons, we repeated the main analysis of VE among immunocompromised persons comparing receipt of a 3<sup>rd</sup> dose at least 28 days after dose 2 with a referent group who were also at least 28 days after dose 2.

To assess the effect of stratum size on conditional model performance we repeated overall estimates using different size clusters by calendar time and site. Since subgroup analyses can generate unbalanced strata, and unconditional analyses can be used with matched data, particularly if strata are sparse<sup>1</sup>, we also generated estimates using unconditional logistic regression models that included calendar time and site or region, in addition to other covariates.

To consider the robustness of our findings to potential bias related to presence of symptoms, illness severity, interview timing, type of SARS-CoV-2 test, access to vaccination or testing, and demographic group we conducted further subgroup analyses of VE by these categories.

As context for the assessment of booster VE after two doses, we also assessed VE of a booster dose compared with unvaccinated participants as the referent, using the same definition of a booster dose and same time period as in the primary analysis. To assess whether estimated protection remained by 2 doses during the

---

<sup>1</sup> Pearce N. Analysis of matched case-control studies. *BMJ*. 2016;352:i969. doi:10.1136/bmj.i969

analysis period we also estimated VE after 2 doses for all participants with a test date from January 1, 2021, or later, using unvaccinated participants as the referent, by product and time since dose 2, within each variant period.

**Box S1: Occupational groups included in the definition of healthcare personnel in the study, by anticipated level of direct patient contact**

*Anticipated substantial patient contact*

- Home health aide/caregiver
- Licensed practical nurse
- Medical assistant
- Nurse practitioner
- Nursing assistant
- Occupational therapist
- Phlebotomist
- Physical therapist
- Physician (attending)
- Physician (fellow)
- Physician (intern/resident)
- Physician assistant
- Registered nurse
- Respiratory therapist
- Speech therapist

*Anticipated moderate patient contact*

- Chaplain
- Environmental services worker
- Food services worker
- Nutritionist
- Social worker
- Student

*Anticipated minimal patient contact*

- Administrative staff
- Cytotechnologist
- Facilities/maintenance worker
- Histotechnologist
- Laboratory personnel
- Medical laboratory technician
- Medical/clinical lab scientist
- Other laboratory personnel
- Pharmacist or pharmacy personnel
- PhD laboratory scientist
- Ward clerk

**Box S2: COVID-19–like symptoms defined for analysis purposes**

- Abdominal pain
- Altered sense of smell or taste
- Chest pain/tightness
- Chills
- Congestion
- Diarrhea
- Documented fever  $\geq 100.0^{\circ}\text{F}$
- Dry cough
- Fatigue or malaise
- Felt feverish
- Headache
- Loss of appetite
- Muscle aches
- Nausea or vomiting
- Productive cough
- Red or bruised toes or feet
- Runny nose
- Shortness of breath
- Sore throat

**Supplementary Table 1: Categorization of underlying health conditions and pregnancy among U.S. healthcare personnel**

| <b>Category</b>               | <b>Notes</b>                                                                                                                                                                               | <b>Source from survey</b>                                                                                                                                          | <b>Source from medical chart</b>                                                                                                                            |
|-------------------------------|--------------------------------------------------------------------------------------------------------------------------------------------------------------------------------------------|--------------------------------------------------------------------------------------------------------------------------------------------------------------------|-------------------------------------------------------------------------------------------------------------------------------------------------------------|
| Pulmonary disease             | Includes asthma, chronic pulmonary disease                                                                                                                                                 | Questions on asthma, COPD, other pulmonary disease; free text                                                                                                      | Questions on asthma, COPD, other pulmonary disease; free text                                                                                               |
| Cardiac disease               | Cardiac disease, excluding hypertension, peripheral vascular disease, or findings that might not be pathologic                                                                             | Question on cardiovascular disease; free text                                                                                                                      | Question on cardiovascular disease; free text                                                                                                               |
| Liver disease                 | Chronic liver disease                                                                                                                                                                      | Question on chronic liver disease; free text                                                                                                                       | Question on chronic liver disease; free text                                                                                                                |
| Renal disease                 | Chronic renal disease, including renal dialysis patients                                                                                                                                   | Questions on chronic renal disease, renal dialysis; free text                                                                                                      | Questions on chronic renal disease, renal dialysis; free text                                                                                               |
| Diabetes mellitus type 1 or 2 | Excludes pre-diabetes                                                                                                                                                                      | Question on diabetes; free text                                                                                                                                    | Question on diabetes, free text                                                                                                                             |
| Obesity                       | Based on clinical diagnosis or BMI                                                                                                                                                         | Reported BMI $\geq 30$                                                                                                                                             | Question on obesity, BMI $\geq 30$                                                                                                                          |
| Overweight without obesity    | Excludes diagnosis of obesity                                                                                                                                                              | Reported BMI $\geq 25$ and BMI $< 30$                                                                                                                              | BMI $\geq 25$ and BMI $< 30$                                                                                                                                |
| Cancer                        | Current or previous solid organ or hematologic cancer                                                                                                                                      | Question on history of cancer; free text                                                                                                                           | Question on history of cancer; free text                                                                                                                    |
| Immunocompromised             | Includes list of any specific condition or medication associated with immunocompromised state, including HIV, hematopoietic stem cell or solid organ transplant                            | Question on survey regarding medication or conditions, or free text, <i>if</i> specific medications or conditions listed that are associated with immunocompromise | Questions on any specific condition or medication associated with immunocompromised state, including HIV, hematopoietic stem cell or solid organ transplant |
| Mood disorder                 | Limited to depressive and mood disorders, including schizophrenia                                                                                                                          | Free text                                                                                                                                                          | Free text                                                                                                                                                   |
| Smoking or substance abuse    | Current or previous cigarette smoking                                                                                                                                                      | Question on history of smoking; free text                                                                                                                          | Question on history of smoking; free text                                                                                                                   |
| Other diagnosis               | Other conditions contributing to the definition of ‘underlying health condition’: congenital disorders, neurodegenerative disorders, sickle cell disease or thalassemia major, TB disease. | Free text                                                                                                                                                          | Free text                                                                                                                                                   |
| Pregnancy                     | Current pregnancy on date of specimen collection                                                                                                                                           | Question on pregnancy and gestation                                                                                                                                | Question on pregnancy and gestation                                                                                                                         |

Abbreviation: BMI – body mass index in kg/m<sup>2</sup>

**Supplementary Figure 1: Inclusion of U.S. healthcare personnel in analyses comparing different vaccine schedules**

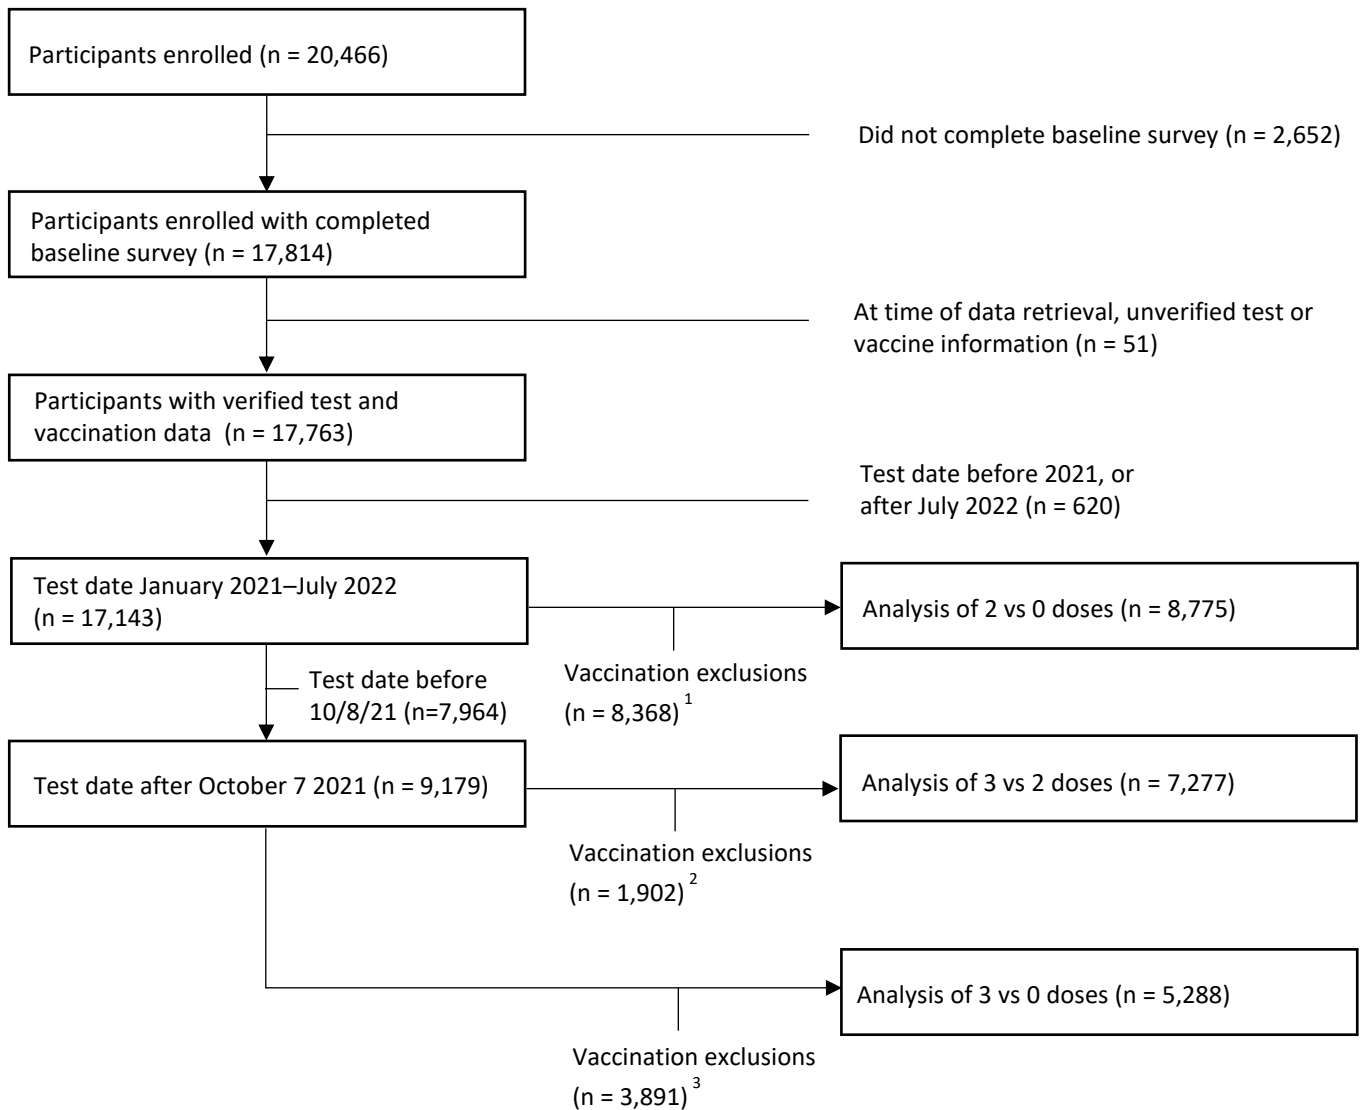

1) not confirmed as mRNA (n=361); 1 dose (n=1,212); ≥3 doses (n=6,268); 2 doses, <14 days (n=523); Dose 1 before December 2020 (n=4)

2) not confirmed as mRNA (n=272); Unvaccinated (n=139); 1 dose (n=78); >3 doses (n=143); <14d after dose 2 or 3 (n=265); Dose 1 before 12/1/2020 or dose 3 before 9/24/21 (n=616); test or dose 3 <5mo after dose 2 (n=389)

3) not confirmed as mRNA (n=272); 1 dose (n=78); 2 doses (n=2,508); >3 doses (n=143); <14d after dose 3 (n=252); Dose 1 before 12/1/2020 or dose 3 before 9/24/21 (n=609); test or dose 3 <5mo after dose 2 (n=29)



**Supplementary Table 2: States of participating health facilities for case- and control-participants included in the primary and supportive analyses of mRNA COVID-19 vaccine effectiveness among U.S. healthcare personnel**

| State                      | Primary VE analysis<br>(3 doses compared with 2 doses) |                          | Supportive analysis of booster VE<br>(3 doses compared with unvaccinated) |                          | Supportive analysis of 2-dose VE<br>(2 doses compared with unvaccinated) |                          |
|----------------------------|--------------------------------------------------------|--------------------------|---------------------------------------------------------------------------|--------------------------|--------------------------------------------------------------------------|--------------------------|
|                            | No. Case-participants                                  | No. Control-participants | No. Case-participants                                                     | No. Control-participants | No. Case-participants                                                    | No. Control-participants |
| Alabama                    | 239                                                    | 58                       | 94                                                                        | 39                       | 370                                                                      | 96                       |
| Arizona                    | 18                                                     | 16                       | 14                                                                        | 13                       | 26                                                                       | 13                       |
| California <sup>1</sup>    | 53                                                     | 45                       | 33                                                                        | 37                       | 75                                                                       | 110                      |
| Colorado                   | 94                                                     | 161                      | 60                                                                        | 135                      | 161                                                                      | 325                      |
| Connecticut                | 124                                                    | 148                      | 77                                                                        | 101                      | 133                                                                      | 184                      |
| Florida                    | 16                                                     | 11                       | 11                                                                        | 7                        | 50                                                                       | 51                       |
| Georgia                    | 145                                                    | 41                       | 81                                                                        | 30                       | 137                                                                      | 97                       |
| Iowa                       | 234                                                    | 481                      | 182                                                                       | 411                      | 160                                                                      | 366                      |
| Illinois                   | 81                                                     | 85                       | 60                                                                        | 71                       | 48                                                                       | 95                       |
| Louisiana                  | 0                                                      | 5                        | 0                                                                         | 2                        | 18                                                                       | 28                       |
| Massachusetts <sup>a</sup> | 472                                                    | 403                      | 272                                                                       | 278                      | 454                                                                      | 530                      |
| Maryland                   | 48                                                     | 73                       | 33                                                                        | 57                       | 146                                                                      | 301                      |
| Minnesota                  | 6                                                      | 9                        | 1                                                                         | 4                        | 26                                                                       | 51                       |
| Missouri                   | 110                                                    | 108                      | 58                                                                        | 88                       | 127                                                                      | 145                      |
| Mississippi                | 65                                                     | 31                       | 28                                                                        | 28                       | 198                                                                      | 185                      |
| New Mexico                 | 85                                                     | 21                       | 29                                                                        | 14                       | 204                                                                      | 158                      |
| New York                   | 568                                                    | 1216                     | 336                                                                       | 1042                     | 644                                                                      | 981                      |
| Oregon                     | 351                                                    | 425                      | 275                                                                       | 386                      | 257                                                                      | 277                      |
| Pennsylvania               | 248                                                    | 162                      | 93                                                                        | 89                       | 416                                                                      | 452                      |
| Tennessee                  | 219                                                    | 438                      | 177                                                                       | 409                      | 189                                                                      | 363                      |
| Washington                 | 103                                                    | 61                       | 79                                                                        | 54                       | 71                                                                       | 57                       |
| <b>Total</b>               | <b>3279</b>                                            | <b>3998</b>              | <b>1993</b>                                                               | <b>3295</b>              | <b>3910</b>                                                              | <b>4865</b>              |

Footnote: a. Includes more than one participating site

**Supplementary Figure 2: Year and month of 2<sup>nd</sup> mRNA COVID-19 vaccine dose among U.S. healthcare personnel, by whether received a booster dose or only two doses**

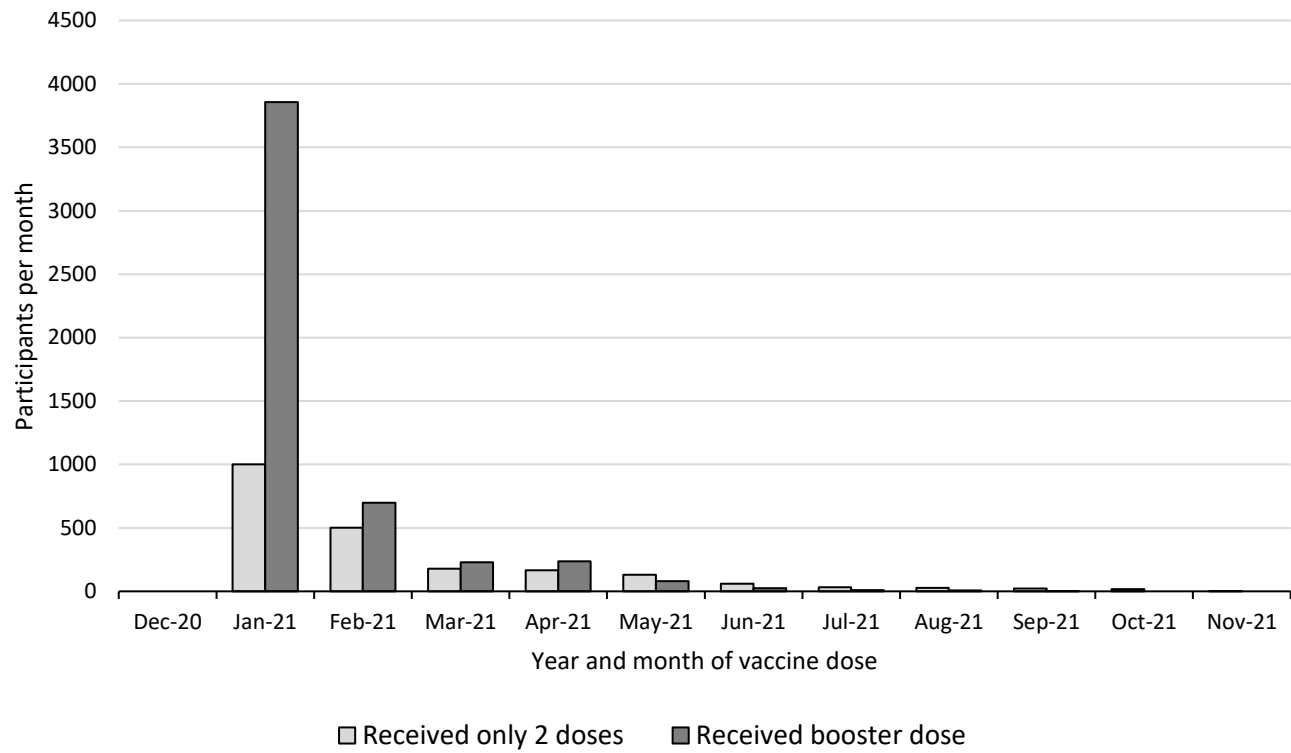

**Supplementary Figure 3: Year and month of an mRNA COVID-19 vaccine booster dose among U.S. healthcare personnel**

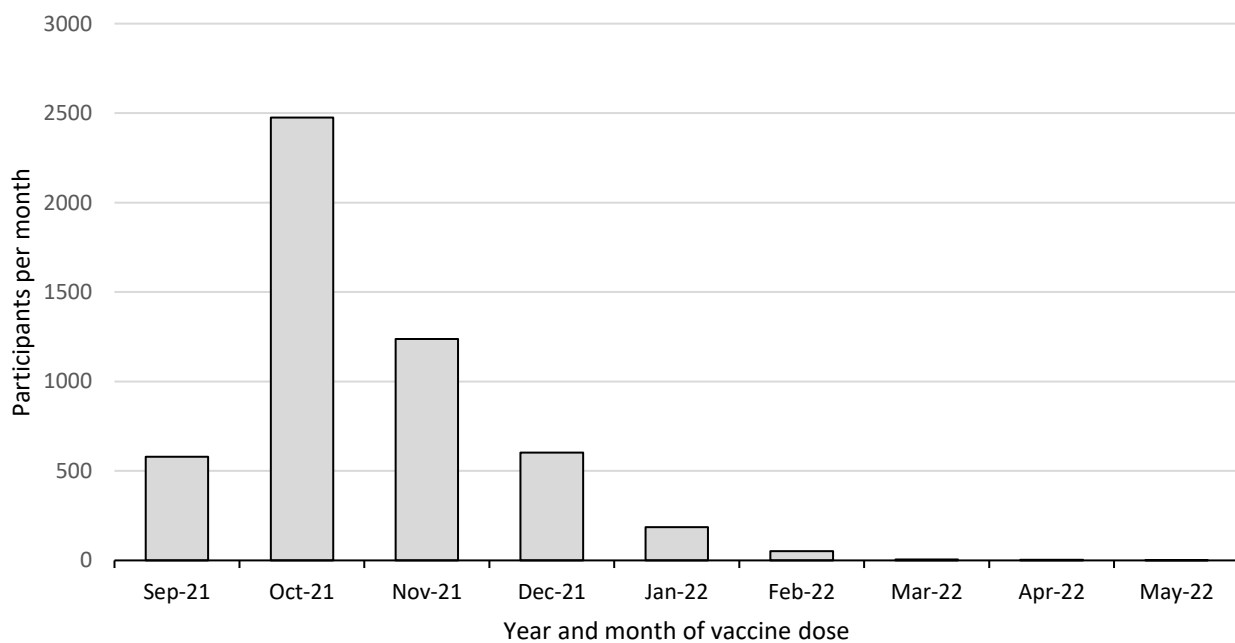

**Supplementary Figure 4: Year and month of SARS-CoV-2 test among U.S. healthcare personnel, by whether received an mRNA COVID-19 booster dose or only the primary series of two doses**

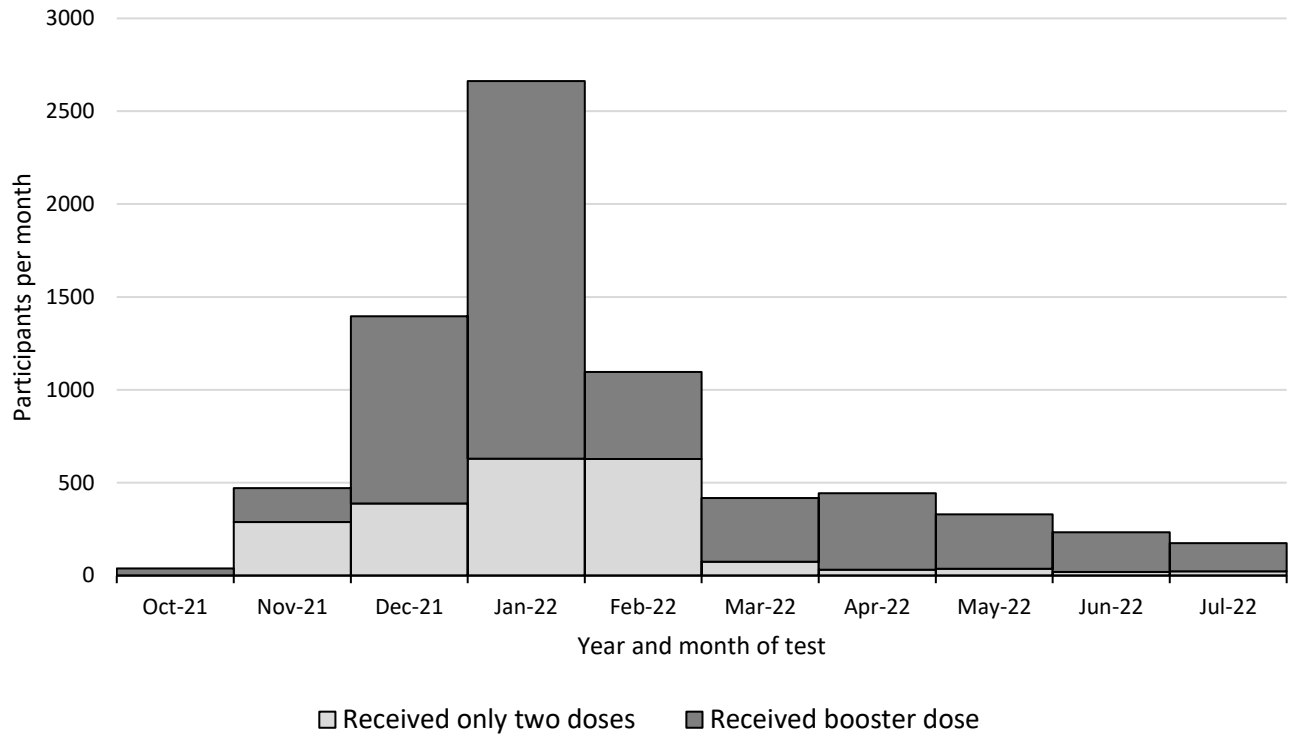

**Supplementary Table 3: Additional Characteristics of Healthcare Personnel with COVID-19 (Case-participants) or who tested negative for SARS-CoV-2 (Control-participants) at 24 U.S. Sites, October 2021–July 2022**

| Characteristic                                          | Case-participants<br>No. with characteristic /<br>Total (%) | Control-participants<br>No. with characteristic /<br>Total (%) | SMD    |
|---------------------------------------------------------|-------------------------------------------------------------|----------------------------------------------------------------|--------|
| HHS region                                              |                                                             |                                                                |        |
| 1                                                       | 596/3279 (18.2%)                                            | 551/3998 (13.8%)                                               | 0.120  |
| 2                                                       | 568/3279 (17.3%)                                            | 1216/3998 (30.4%)                                              | -0.311 |
| 3                                                       | 296/3279 (9%)                                               | 235/3998 (5.9%)                                                | 0.120  |
| 4                                                       | 684/3279 (20.9%)                                            | 579/3998 (14.5%)                                               | 0.168  |
| 5                                                       | 87/3279 (2.7%)                                              | 94/3998 (2.4%)                                                 | 0.019  |
| 6                                                       | 85/3279 (2.6%)                                              | 26/3998 (0.7%)                                                 | 0.154  |
| 7                                                       | 344/3279 (10.5%)                                            | 589/3998 (14.7%)                                               | -0.128 |
| 8                                                       | 94/3279 (2.9%)                                              | 161/3998 (4%)                                                  | -0.064 |
| 9                                                       | 71/3279 (2.2%)                                              | 61/3998 (1.5%)                                                 | 0.048  |
| 10                                                      | 454/3279 (13.8%)                                            | 486/3998 (12.2%)                                               | 0.050  |
| Health insurance                                        |                                                             |                                                                |        |
| Private                                                 | 3007/3273 (91.9%)                                           | 3686/3996 (92.2%)                                              | -0.014 |
| Government                                              | 112/3273 (3.4%)                                             | 136/3996 (3.4%)                                                | 0.001  |
| Other                                                   | 9/3273 (0.3%)                                               | 13/3996 (0.3%)                                                 | -0.009 |
| No insurance                                            | 145/3273 (4.4%)                                             | 161/3996 (4%)                                                  | 0.020  |
| Household income                                        |                                                             |                                                                |        |
| <50k                                                    | 413/3271 (12.6%)                                            | 479/3997 (12%)                                                 | 0.020  |
| 50–100k                                                 | 1059/3271 (32.4%)                                           | 1254/3997 (31.4%)                                              | 0.021  |
| ≥100k                                                   | 1524/3271 (46.6%)                                           | 1941/3997 (48.6%)                                              | -0.039 |
| Declined                                                | 275/3271 (8.4%)                                             | 323/3997 (8.1%)                                                | 0.012  |
| Complete precautions if close contact<br>with a patient |                                                             |                                                                |        |
| Always or mostly                                        | 184/471 (39.1%)                                             | 257/762 (33.7%)                                                | 0.111  |
| Sometimes                                               | 108/471 (22.9%)                                             | 166/762 (21.8%)                                                | 0.027  |
| Rarely or never                                         | 146/471 (31%)                                               | 284/762 (37.3%)                                                | -0.132 |
| Not sure                                                | 33/471 (7%)                                                 | 55/762 (7.2%)                                                  | -0.008 |
| Number of symptoms, if reported                         |                                                             |                                                                |        |
| 1–3                                                     | 756/3161 (23.9%)                                            | 1801/3296 (54.6%)                                              | -0.663 |
| >3                                                      | 2405/3161 (76.1%)                                           | 1495/3296 (45.4%)                                              | 0.663  |
| Hospitalized with illness                               |                                                             |                                                                |        |
| No                                                      | 195/203 (96.1%)                                             | 168/192 (87.5%)                                                | 0.315  |
| Yes                                                     | 8/203 (3.9%)                                                | 24/192 (12.5%)                                                 | -0.315 |
| Work in an ED or hospital                               |                                                             |                                                                |        |
| No                                                      | 868/3279 (26.5%)                                            | 1250/3998 (31.3%)                                              | -0.106 |
| Yes                                                     | 2411/3279 (73.5%)                                           | 2748/3998 (68.7%)                                              | 0.106  |
| Days from test date to interview                        |                                                             |                                                                |        |
| 14–60                                                   | 3232/3278 (98.6%)                                           | 3720/3996 (93.1%)                                              | 0.278  |
| >60                                                     | 46/3278 (1.4%)                                              | 276/3996 (6.9%)                                                | -0.278 |

Abbreviations: SMD, standardized mean difference. ED, emergency department

**Supplementary Table 4: Characteristics of healthcare personnel who received a second COVID-19 mRNA vaccine dose by whether an mRNA booster dose was also received at 24 U.S. Sites, October 2021–July 2022**

| Characteristic                                                          | Did not receive booster dose<br>(n=2129) | Received booster dose<br>(n=5070) | SMD    |
|-------------------------------------------------------------------------|------------------------------------------|-----------------------------------|--------|
| Age group, years                                                        |                                          |                                   |        |
| 18–29                                                                   | 529/2120 (25.0%)                         | 968/5103 (19.0%)                  | 0.145  |
| 30–39                                                                   | 693/2120 (32.7%)                         | 1749/5103 (34.3%)                 | -0.034 |
| 40–49                                                                   | 455/2120 (21.5%)                         | 1113/5103 (21.8%)                 | -0.008 |
| ≥50                                                                     | 443/2120 (20.9%)                         | 1273/5103 (24.9%)                 | -0.096 |
| Sex                                                                     |                                          |                                   |        |
| Male                                                                    | 361/2129 (17.0%)                         | 978/5139 (19.0%)                  | -0.054 |
| Female                                                                  | 1767/2129 (83%)                          | 4153/5139 (80.8%)                 | 0.057  |
| Unknown                                                                 | 1/2129 (0%)                              | 8/5139 (0.2%)                     | -0.034 |
| Race and ethnicity                                                      |                                          |                                   |        |
| White, non-Hispanic                                                     | 1593/2094 (76.1%)                        | 4099/5055 (81.1%)                 | -0.122 |
| Black, non-Hispanic                                                     | 200/2094 (9.6%)                          | 258/5055 (5.1%)                   | 0.171  |
| Hispanic                                                                | 199/2094 (9.5%)                          | 310/5055 (6.1%)                   | 0.126  |
| Other, non-Hispanic                                                     | 102/2094 (4.9%)                          | 388/5055 (7.7%)                   | -0.116 |
| Educational level                                                       |                                          |                                   |        |
| No college degree                                                       | 375/2127 (17.6%)                         | 434/5141 (8.4%)                   | 0.275  |
| College degree                                                          | 1536/2127 (72.2%)                        | 3471/5141 (67.5%)                 | 0.103  |
| Doctoral or professional degree                                         | 211/2127 (9.9%)                          | 1224/5141 (23.8%)                 | -0.377 |
| Unknown                                                                 | 5/2127 (0.2%)                            | 12/5141 (0.2%)                    | 0.000  |
| Categories of underlying health conditions                              |                                          |                                   |        |
| 0                                                                       | 542/2134 (25.4%)                         | 1597/5143 (31.1%)                 | -0.126 |
| 1                                                                       | 924/2134 (43.3%)                         | 2115/5143 (41.1%)                 | 0.044  |
| ≥2                                                                      | 668/2134 (31.3%)                         | 1431/5143 (27.8%)                 | 0.076  |
| Variant period of test                                                  |                                          |                                   |        |
| Delta                                                                   | 926/2134 (43.4%)                         | 528/5143 (10.3%)                  | 0.806  |
| Omicron                                                                 | 1208/2134 (56.6%)                        | 4615/5143 (89.7%)                 | -0.806 |
| Vaccination status (overall)                                            |                                          |                                   |        |
| After dose 2                                                            | 2134/2134 (100%)                         | 0/5143 (0%)                       | -      |
| After booster                                                           | 0/2134 (0%)                              | 5143/5143 (100%)                  | -      |
| Known COVID-19 contact in 14 days before symptom onset or positive test |                                          |                                   |        |
| At work, patient                                                        | 1388/2131 (65.1%)                        | 3284/5143 (63.9%)                 | 0.027  |
| At work, not a patient                                                  | 686/1697 (40.4%)                         | 1593/4138 (38.5%)                 | 0.026  |
| At work, not a patient                                                  | 481/1544 (31.2%)                         | 1189/3781 (31.4%)                 | -0.013 |
| Outside work                                                            | 786/2005 (39.2%)                         | 1951/4558 (42.8%)                 | -0.022 |
| Fever present, if any symptoms                                          |                                          |                                   |        |
| No                                                                      | 1011/2134 (47.4%)                        | 3588/5143 (69.8%)                 | -0.467 |
| Yes                                                                     | 1123/2134 (52.6%)                        | 1555/5143 (30.2%)                 | 0.467  |

Abbreviations: SMD, standardized mean difference.

**Supplementary Table 5: Characteristics of healthcare personnel tested during the Delta-predominant period or during the Omicron-predominant period at 24 U.S. Sites, October 2021–July 2022**

| Characteristic                        | Delta-predominant period <sup>a</sup> | Omicron-predominant period <sup>a</sup> | SMD    |
|---------------------------------------|---------------------------------------|-----------------------------------------|--------|
| Age group, years                      |                                       |                                         |        |
| 18–29                                 | 323/1448 (22.3%)                      | 1174/5775 (20.3%)                       | 0.048  |
| 30–39                                 | 485/1448 (33.5%)                      | 1957/5775 (33.9%)                       | -0.008 |
| 40–49                                 | 300/1448 (20.7%)                      | 1268/5775 (22%)                         | -0.030 |
| ≥50                                   | 340/1448 (23.5%)                      | 1376/5775 (23.8%)                       | -0.008 |
| Sex                                   |                                       |                                         |        |
| Male                                  | 284/1453 (19.5%)                      | 1055/5815 (18.1%)                       | 0.036  |
| Female                                | 1168/1453 (80.4%)                     | 4752/5815 (81.7%)                       | -0.034 |
| Unknown                               | 1/1453 (0.1%)                         | 8/5815 (0.1%)                           | -0.021 |
| Race and ethnicity                    |                                       |                                         |        |
| White, non-Hispanic                   | 1186/1436 (82.6%)                     | 4506/5713 (78.9%)                       | 0.094  |
| Black, non-Hispanic                   | 60/1436 (4.2%)                        | 398/5713 (7.0%)                         | -0.122 |
| Hispanic                              | 125/1436 (8.7%)                       | 384/5713 (6.7%)                         | 0.074  |
| Other, non-Hispanic                   | 65/1436 (4.5%)                        | 425/5713 (7.4%)                         | -0.123 |
| Educational level                     |                                       |                                         |        |
| No college degree                     | 176/1453 (12.1%)                      | 633/5815 (10.9%)                        | 0.038  |
| College degree                        | 1029/1453 (70.8%)                     | 3978/5815 (68.4%)                       | 0.052  |
| Doctoral or professional degree       | 246/1453 (16.9%)                      | 1189/5815 (20.4%)                       | -0.090 |
| Unknown                               | 2/1453 (0.1%)                         | 15/5815 (0.3%)                          | -0.027 |
| Underlying health conditions          |                                       |                                         |        |
| 0                                     | 433/1454 (29.8%)                      | 1706/5823 (29.3%)                       | 0.011  |
| 1                                     | 594/1454 (40.9%)                      | 2445/5823 (42.0%)                       | -0.023 |
| ≥2                                    | 427/1454 (29.4%)                      | 1672/5823 (28.7%)                       | 0.014  |
| Variant period of test <sup>a</sup>   |                                       |                                         |        |
| Delta                                 | 1454/1454 (100%)                      | 0/5823 (0%)                             | -      |
| Omicron                               | 0/1454 (0%)                           | 5823/5823 (100%)                        | -      |
| Vaccination status (overall)          |                                       |                                         |        |
| After dose 2                          | 926/1454 (63.7%)                      | 1208/5823 (20.7%)                       | 0.965  |
| After booster                         | 528/1454 (36.3%)                      | 4615/5823 (79.3%)                       | -0.965 |
| Known COVID-19 contact in 14 days     |                                       |                                         |        |
| before symptom onset or positive test | 830/1453 (57.1%)                      | 3842/5821 (66.0%)                       | -0.183 |
| At work, patient                      | 448/1216 (36.8%)                      | 1831/4619 (39.6%)                       | -0.014 |
| At work, not a patient                | 220/1146 (19.2%)                      | 1450/4179 (34.7%)                       | -0.246 |
| Outside work                          | 436/1362 (32.0%)                      | 2301/5201 (44.2%)                       | -0.201 |

Abbreviations: SMD, standardized mean difference.

a. During this analysis period, the Delta-predominant period was defined as before December 19, 2021; the Omicron-predominant period was defined as December 19, 2021 or later.

**Supplementary Table 6: Characteristics of Healthcare Personnel with COVID-19 (Case-participants) or who tested negative for SARS-CoV-2 (Control-participants) at 24 U.S. Sites, October 2021–July 2022 (subset of participants who received a booster dose or were unvaccinated)**

| Characteristic                                                             | Case-participants<br>No. with characteristic /<br>Total (%) | Control-participants<br>No. with characteristic /<br>Total (%) | SMD    |
|----------------------------------------------------------------------------|-------------------------------------------------------------|----------------------------------------------------------------|--------|
| Age group, years                                                           |                                                             |                                                                |        |
| 18–29                                                                      | 399/1977 (20.2%)                                            | 603/3265 (18.5%)                                               | 0.043  |
| 30–39                                                                      | 683/1977 (34.5%)                                            | 1118/3265 (34.2%)                                              | 0.006  |
| 40–49                                                                      | 420/1977 (21.2%)                                            | 725/3265 (22.2%)                                               | -0.023 |
| ≥50                                                                        | 475/1977 (24.0%)                                            | 819/3265 (25.1%)                                               | -0.025 |
| Sex                                                                        |                                                             |                                                                |        |
| Male                                                                       | 400/1993 (20.1%)                                            | 599/3291 (18.2%)                                               | 0.048  |
| Female                                                                     | 1591/1993 (79.8%)                                           | 2686/3291 (81.6%)                                              | -0.045 |
| Unknown                                                                    | 2/1993 (0.1%)                                               | 6/3291 (0.2%)                                                  | -0.022 |
| Race and ethnicity                                                         |                                                             |                                                                |        |
| White, non-Hispanic                                                        | 1535/1957 (78.4%)                                           | 2667/3236 (82.4%)                                              | -0.100 |
| Black, non-Hispanic                                                        | 126/1957 (6.4%)                                             | 149/3236 (4.6%)                                                | 0.080  |
| Hispanic                                                                   | 138/1957 (7.1%)                                             | 187/3236 (5.8%)                                                | 0.052  |
| Other, non-Hispanic                                                        | 158/1957 (8.1%)                                             | 233/3236 (7.2%)                                                | 0.033  |
| Educational level                                                          |                                                             |                                                                |        |
| No college degree                                                          | 178/1991 (8.9%)                                             | 279/3295 (8.5%)                                                | 0.017  |
| College degree                                                             | 1375/1991 (69.1%)                                           | 2212/3295 (67.1%)                                              | 0.041  |
| Doctoral or professional degree                                            | 432/1991 (21.7%)                                            | 797/3295 (24.2%)                                               | -0.059 |
| Unknown                                                                    | 6/1991 (0.3%)                                               | 7/3295 (0.2%)                                                  | 0.018  |
| Underlying health conditions                                               |                                                             |                                                                |        |
| 0                                                                          | 647/1993 (32.5%)                                            | 994/3295 (30.2%)                                               | 0.050  |
| 1                                                                          | 820/1993 (41.1%)                                            | 1354/3295 (41.1%)                                              | 0.001  |
| ≥2                                                                         | 526/1993 (26.4%)                                            | 947/3295 (28.7%)                                               | -0.053 |
| Variant period of test                                                     |                                                             |                                                                |        |
| Delta                                                                      | 144/1993 (7.2%)                                             | 460/3295 (14%)                                                 | -0.220 |
| Omicron                                                                    | 1849/1993 (92.8%)                                           | 2835/3295 (86.0%)                                              | 0.220  |
| Vaccination status (overall)                                               |                                                             |                                                                |        |
| Unvaccinated                                                               | 85/1993 (4.3%)                                              | 54/3295 (1.6%)                                                 | 0.156  |
| After booster                                                              | 1908/1993 (95.7%)                                           | 3241/3295 (98.4%)                                              | -0.156 |
| Known COVID-19 contact in 14 days<br>before symptom onset or positive test |                                                             |                                                                |        |
| At work, patient                                                           | 597/1568 (38.1%)                                            | 1043/2690 (38.8%)                                              | -0.037 |
| At work, not a patient                                                     | 416/1372 (30.3%)                                            | 801/2521 (31.8%)                                               | -0.082 |
| Outside work                                                               | 949/1733 (54.8%)                                            | 1045/2963 (35.3%)                                              | 0.329  |

Abbreviations: SMD, standardized mean difference.

**Supplementary Table 7: Characteristics of Healthcare Personnel with COVID-19 (Case Participants) or who tested negative for SARS-CoV-2 (Control Participants) at 24 U.S. Sites, January 2021–July 2022 (subset of participants who received two doses or were unvaccinated)**

| Characteristic                        | Case-participants<br>No. with characteristic /<br>Total (%) | Case-participants<br>No. with characteristic /<br>Total (%) | SMD    |
|---------------------------------------|-------------------------------------------------------------|-------------------------------------------------------------|--------|
| Age group, years                      |                                                             |                                                             |        |
| 18–29                                 | 959/3884 (24.7%)                                            | 1010/4822 (20.9%)                                           | 0.089  |
| 30–39                                 | 1288/3884 (33.2%)                                           | 1825/4822 (37.8%)                                           | -0.098 |
| 40–49                                 | 866/3884 (22.3%)                                            | 944/4822 (19.6%)                                            | 0.067  |
| ≥50                                   | 771/3884 (19.9%)                                            | 1043/4822 (21.6%)                                           | -0.044 |
| Sex                                   |                                                             |                                                             |        |
| Male                                  | 662/3897 (17%)                                              | 853/4856 (17.6%)                                            | -0.015 |
| Female                                | 3230/3897 (82.9%)                                           | 3997/4856 (82.3%)                                           | 0.015  |
| Unknown                               | 5/3897 (0.1%)                                               | 6/4856 (0.1%)                                               | 0.001  |
| Race and ethnicity                    |                                                             |                                                             |        |
| White, non-Hispanic                   | 2693/3829 (70.3%)                                           | 3656/4761 (76.8%)                                           | -0.147 |
| Black, non-Hispanic                   | 517/3829 (13.5%)                                            | 418/4761 (8.8%)                                             | 0.151  |
| Hispanic                              | 411/3829 (10.7%)                                            | 403/4761 (8.5%)                                             | 0.077  |
| Other, non-Hispanic                   | 208/3829 (5.4%)                                             | 284/4761 (6%)                                               | -0.023 |
| Educational level                     |                                                             |                                                             |        |
| No college degree                     | 709/3898 (18.2%)                                            | 752/4856 (15.5%)                                            | 0.072  |
| College degree                        | 2784/3898 (71.4%)                                           | 3203/4856 (66%)                                             | 0.118  |
| Doctoral or professional degree       | 398/3898 (10.2%)                                            | 889/4856 (18.3%)                                            | -0.233 |
| Unknown                               | 7/3898 (0.2%)                                               | 12/4856 (0.2%)                                              | -0.015 |
| Underlying health conditions          |                                                             |                                                             |        |
| 0                                     | 999/3910 (25.5%)                                            | 1246/4865 (25.6%)                                           | -0.001 |
| 1                                     | 1768/3910 (45.2%)                                           | 2069/4865 (42.5%)                                           | 0.054  |
| ≥2                                    | 1143/3910 (29.2%)                                           | 1550/4865 (31.9%)                                           | -0.057 |
| Variant period of test <sup>a</sup>   |                                                             |                                                             |        |
| Pre-Delta period                      | 885/3910 (22.6%)                                            | 1695/4865 (34.8%)                                           | -0.272 |
| Delta-predominant period              | 1950/3910 (49.9%)                                           | 2710/4865 (55.7%)                                           | -0.117 |
| Omicron-predominant period            | 1075/3910 (27.5%)                                           | 460/4865 (9.5%)                                             | 0.478  |
| Vaccination status (overall)          |                                                             |                                                             |        |
| Unvaccinated                          | 956/3910 (24.5%)                                            | 750/4865 (15.4%)                                            | 0.228  |
| After dose 2                          | 2954/3910 (75.5%)                                           | 4115/4865 (84.6%)                                           | -0.228 |
| Known COVID-19 contact in 14 days     |                                                             |                                                             |        |
| before symptom onset or positive test | 2601/3902 (66.7%)                                           | 2426/4859 (49.9%)                                           | 0.344  |
| At work, patient                      | 1187/3192 (37.2%)                                           | 1498/4092 (36.6%)                                           | -0.009 |
| At work, not a patient                | 699/2885 (24.2%)                                            | 818/3913 (20.9%)                                            | 0.029  |
| Outside work                          | 1630/3677 (44.3%)                                           | 935/4626 (20.2%)                                            | 0.504  |

Abbreviations: SMD, standardized mean difference.

a. The Delta-predominant period was defined as June 20, 2021–December 18, 2021; the Omicron-predominant period was defined as December 19, 2021 or later.



**Supplementary Table 8: Estimated Vaccine Effectiveness of an mRNA booster dose against COVID-19 among U.S. healthcare personnel who received two mRNA doses, by variant-predominant period, October 2021–July 2022 (including unadjusted and adjusted estimates)**

| Characteristic                                | Case-participants after a booster dose / No. received 2 doses ≥5 months earlier (%) <sup>a</sup> | Control-participants after a booster dose / No. received 2 doses ≥5 months earlier (%) <sup>a</sup> | Unadjusted VE (95% CI) <sup>b</sup> | Case-participants after a booster dose / No. received 2 doses ≥5 months earlier (%) <sup>c</sup> | Control-participants after a booster dose / No. received 2 doses ≥5 months earlier (%) <sup>c</sup> | Adjusted VE (95% CI) <sup>b</sup> |
|-----------------------------------------------|--------------------------------------------------------------------------------------------------|-----------------------------------------------------------------------------------------------------|-------------------------------------|--------------------------------------------------------------------------------------------------|-----------------------------------------------------------------------------------------------------|-----------------------------------|
| <b>Any period</b>                             |                                                                                                  |                                                                                                     |                                     |                                                                                                  |                                                                                                     |                                   |
| Booster product                               |                                                                                                  |                                                                                                     |                                     |                                                                                                  |                                                                                                     |                                   |
| Any mRNA                                      | 1904/3279 (58.1%)                                                                                | 3239/3998 (81.0%)                                                                                   | <b>71.5 (67.3-75.2)</b>             | 1854/3190 (58.1%)                                                                                | 3153/3892 (81.0%)                                                                                   | <b>71.1 (66.7-75.0)</b>           |
| Pfizer BioNTech                               | 1412/2372 (59.5%)                                                                                | 2394/2887 (82.9%)                                                                                   | <b>72.1 (67.1-76.3)</b>             | 1373/2301 (59.7%)                                                                                | 2327/2808 (82.9%)                                                                                   | <b>71.2 (65.8-75.7)</b>           |
| Moderna                                       | 395/801 (49.3%)                                                                                  | 708/971 (72.9%)                                                                                     | <b>70.9 (61.0-78.2)</b>             | 391/790 (49.5%)                                                                                  | 693/948 (73.1%)                                                                                     | <b>71.6 (61.3-79.2)</b>           |
| Days since booster dose                       |                                                                                                  |                                                                                                     |                                     |                                                                                                  |                                                                                                     |                                   |
| <60                                           | 362/1737 (20.8%)                                                                                 | 845/1604 (52.7%)                                                                                    | <b>78.4 (74.1-82.0)</b>             | 356/1692 (21.0%)                                                                                 | 817/1556 (52.5%)                                                                                    | <b>78.2 (73.6-82.0)</b>           |
| 60-119                                        | 1007/2382 (42.3%)                                                                                | 1536/2295 (66.9%)                                                                                   | <b>68.0 (62.3-72.9)</b>             | 982/2318 (42.4%)                                                                                 | 1505/2244 (67.1%)                                                                                   | <b>67.1 (60.9-72.3)</b>           |
| ≥120                                          | 535/1910 (28.0%)                                                                                 | 858/1617 (53.1%)                                                                                    | <b>34.8 (9.6-52.9)</b>              | 516/1852 (27.9%)                                                                                 | 831/1570 (52.9%)                                                                                    | <b>33.6 (6.6-52.8)</b>            |
| <b>Delta-predominant period<sup>d</sup></b>   |                                                                                                  |                                                                                                     |                                     |                                                                                                  |                                                                                                     |                                   |
| Booster product                               |                                                                                                  |                                                                                                     |                                     |                                                                                                  |                                                                                                     |                                   |
| Any mRNA                                      | 96/620 (15.5%)                                                                                   | 432/834 (51.8%)                                                                                     | <b>85.8 (80.6-89.6)</b>             | 96/613 (15.7%)                                                                                   | 422/815 (51.8%)                                                                                     | <b>86.3 (81.1-90.1)</b>           |
| Pfizer BioNTech                               | 76/421 (18.1%)                                                                                   | 342/593 (57.7%)                                                                                     | <b>86.8 (80.9-90.9)</b>             | 76/416 (18.3%)                                                                                   | 335/580 (57.8%)                                                                                     | <b>88.0 (82.3-91.9)</b>           |
| Moderna                                       | 17/195 (8.7%)                                                                                    | 76/226 (33.6%)                                                                                      | <b>84.5 (69.4-92.2)</b>             | 17/193 (8.8%)                                                                                    | 73/220 (33.2%)                                                                                      | <b>85.4 (69.4-93.0)</b>           |
| Days since booster dose                       |                                                                                                  |                                                                                                     |                                     |                                                                                                  |                                                                                                     |                                   |
| <60                                           | 68/592 (11.5%)                                                                                   | 340/742 (45.8%)                                                                                     | <b>85.1 (79.3-89.3)</b>             | 68/585 (11.6%)                                                                                   | 331/724 (45.7%)                                                                                     | <b>86.2 (80.4-90.3)</b>           |
| 60-119                                        | 28/552 (5.1%)                                                                                    | 92/494 (18.6%)                                                                                      | <b>86.8 (75.6-92.8)</b>             | 28/545 (5.1%)                                                                                    | 91/484 (18.8%)                                                                                      | <b>86.6 (74.8-92.9)</b>           |
| ≥120                                          | 0/524 (0%)                                                                                       | 0/402 (0%)                                                                                          | -                                   | 0/517 (0%)                                                                                       | 0/393 (0%)                                                                                          | -                                 |
| <b>Omicron-predominant period<sup>d</sup></b> |                                                                                                  |                                                                                                     |                                     |                                                                                                  |                                                                                                     |                                   |
| Booster product                               |                                                                                                  |                                                                                                     |                                     |                                                                                                  |                                                                                                     |                                   |
| Any mRNA                                      | 1808/2659 (68.0%)                                                                                | 2807/3164 (88.7%)                                                                                   | <b>65.4 (59.6-70.3)</b>             | 1758/2577 (68.2%)                                                                                | 2731/3077 (88.8%)                                                                                   | <b>64.6 (58.4-69.9)</b>           |
| Pfizer BioNTech                               | 1336/1951 (68.5%)                                                                                | 2052/2294 (89.5%)                                                                                   | <b>65.4 (58.4-71.3)</b>             | 1297/1885 (68.8%)                                                                                | 1992/2228 (89.4%)                                                                                   | <b>63.6 (55.8-69.9)</b>           |
| Moderna                                       | 378/606 (62.4%)                                                                                  | 632/745 (84.8%)                                                                                     | <b>65.8 (52.6-75.4)</b>             | 374/597 (62.6%)                                                                                  | 620/728 (85.2%)                                                                                     | <b>66.8 (53.0-76.6)</b>           |
| Days since booster dose                       |                                                                                                  |                                                                                                     |                                     |                                                                                                  |                                                                                                     |                                   |
| <60                                           | 294/1145 (25.7%)                                                                                 | 505/862 (58.6%)                                                                                     | <b>74.3 (67.9-79.4)</b>             | 288/1107 (26.0%)                                                                                 | 486/832 (58.4%)                                                                                     | <b>73.4 (66.6-78.9)</b>           |
| 60-119                                        | 979/1830 (53.5%)                                                                                 | 1444/1801 (80.2%)                                                                                   | <b>65.2 (58.7-70.8)</b>             | 954/1773 (53.8%)                                                                                 | 1414/1760 (80.3%)                                                                                   | <b>63.8 (56.6-69.8)</b>           |
| ≥120                                          | 535/1386 (38.6%)                                                                                 | 858/1215 (70.6%)                                                                                    | <b>34.8 (9.6-52.9)</b>              | 516/1335 (38.7%)                                                                                 | 831/1177 (70.6%)                                                                                    | <b>32.1 (4.5-51.7)</b>            |

a. Case-participants had symptomatic SARS-CoV-2 infection confirmed by antigen or nucleic acid amplification test; control-participants had a negative SARS-CoV-2 nucleic acid amplification test, with or without symptoms. Vaccination status was assigned on the test date as after a booster dose if ≥14 days after an mRNA booster dose that was administered ≥5 months after dose 2. The referent group was receipt of dose 2 ≥5 months before the test date without a booster dose.

b. Vaccine effectiveness was estimated as 100% multiplied by the reciprocal of the odds ratio for vaccination status by case/control status. A conditional model was used with a cluster of two-week matching period and enrolling site to account for matching. Adjusted vaccine effectiveness included age group in years (18–29, 30–39, 40–49, ≥50), sex, race and ethnicity (White non-Hispanic, other), educational level (doctoral or professional degree, other), underlying health conditions (yes, no), known contact with a person with COVID-19 outside the workplace (yes, no).

c. Observations restricted to participants included in the multivariable model (with no missing covariate information).

d. The Delta-predominant period was defined as June 20, 2021–December 18, 2021; the Omicron-predominant period was defined as December 19, 2021, or later.

**Supplementary Table 9: Estimated Effectiveness of mRNA vaccines against COVID-19 among U.S. healthcare personnel who received two mRNA doses by variant-predominant period, October 2021–July 2022, using *conditional* logistic regression**

| Characteristic                                | Case-participants after a booster dose / All case-participants (%) <sup>a</sup> | Control-participants after a booster dose / All control-participants (%) <sup>a</sup> | Unadjusted VE (95% CI) <sup>b</sup> | Case-participants after a booster dose / All case-participants (%) <sup>c</sup> | Control-participants after a booster dose / All control-participants (%) <sup>c</sup> | Adjusted VE (95% CI) <sup>b</sup> |
|-----------------------------------------------|---------------------------------------------------------------------------------|---------------------------------------------------------------------------------------|-------------------------------------|---------------------------------------------------------------------------------|---------------------------------------------------------------------------------------|-----------------------------------|
| <b>Overall period<sup>d</sup></b>             |                                                                                 |                                                                                       |                                     |                                                                                 |                                                                                       |                                   |
| Age, years                                    |                                                                                 |                                                                                       |                                     |                                                                                 |                                                                                       |                                   |
| <50                                           | 1433/2519 (56.9%)                                                               | 2397/2988 (80.2%)                                                                     | <b>70.9 (66.2-75.0)</b>             | 1407/2472 (56.9%)                                                               | 2356/2938 (80.2%)                                                                     | <b>70.4 (65.4-74.6)</b>           |
| ≥50                                           | 458/739 (62.0%)                                                                 | 815/977 (83.4%)                                                                       | <b>73.5 (65.4-79.7)</b>             | 447/718 (62.3%)                                                                 | 797/954 (83.5%)                                                                       | <b>73.8 (65.6-80.1)</b>           |
| Underlying health conditions                  |                                                                                 |                                                                                       |                                     |                                                                                 |                                                                                       |                                   |
| No                                            | 619/962 (64.3%)                                                                 | 978/1177 (83.1%)                                                                      | <b>68.4 (60.1-75.0)</b>             | 599/929 (64.5%)                                                                 | 941/1132 (83.1%)                                                                      | <b>67.6 (58.7-74.6)</b>           |
| Yes                                           | 1285/2317 (55.5%)                                                               | 2261/2821 (80.1%)                                                                     | <b>72.8 (68.2-76.7)</b>             | 1255/2261 (55.5%)                                                               | 2212/2760 (80.1%)                                                                     | <b>72.3 (67.5-76.3)</b>           |
| Pregnancy <sup>e</sup>                        |                                                                                 |                                                                                       |                                     |                                                                                 |                                                                                       |                                   |
| No                                            | 1114/1977 (56.3%)                                                               | 1890/2362 (80.0%)                                                                     | <b>74.4 (69.9-78.2)</b>             | 1096/1947 (56.3%)                                                               | 1864/2328 (80.1%)                                                                     | <b>74.7 (70.2-78.6)</b>           |
| Yes                                           | 37/69 (53.6%)                                                                   | 70/89 (78.7%)                                                                         | <b>76.0 (50.7-88.3)</b>             | 37/69 (53.6%)                                                                   | 70/89 (78.7%)                                                                         | <b>74.2 (46.5-87.6)</b>           |
| Immunocompromised <sup>f</sup>                |                                                                                 |                                                                                       |                                     |                                                                                 |                                                                                       |                                   |
| No                                            | 1869/3217 (58.1%)                                                               | 3162/3910 (80.9%)                                                                     | <b>75.3 (71.9-78.3)</b>             | 1820/3132 (58.1%)                                                               | 3076/3804 (80.9%)                                                                     | <b>75.1 (71.5-78.2)</b>           |
| Yes                                           | 35/62 (56.5%)                                                                   | 77/88 (87.5%)                                                                         | <b>86.6 (69.0-94.2)</b>             | 34/58 (58.6%)                                                                   | 77/88 (87.5%)                                                                         | <b>85.0 (64.8-93.6)</b>           |
| <b>Delta-predominant period<sup>d</sup></b>   |                                                                                 |                                                                                       |                                     |                                                                                 |                                                                                       |                                   |
| Age, years                                    |                                                                                 |                                                                                       |                                     |                                                                                 |                                                                                       |                                   |
| <50                                           | 76/490 (15.5%)                                                                  | 313/618 (50.6%)                                                                       | <b>84.3 (77.8-88.8)</b>             | 76/485 (15.7%)                                                                  | 309/608 (50.8%)                                                                       | <b>85.3 (78.8-89.7)</b>           |
| ≥50                                           | 20/129 (15.5%)                                                                  | 115/211 (54.5%)                                                                       | <b>89.2 (80.2-94.1)</b>             | 20/128 (15.6%)                                                                  | 113/207 (54.6%)                                                                       | <b>89.2 (80.0-94.2)</b>           |
| Underlying health conditions                  |                                                                                 |                                                                                       |                                     |                                                                                 |                                                                                       |                                   |
| No                                            | 39/193 (20.2%)                                                                  | 131/240 (54.6%)                                                                       | <b>83.1 (72.5-89.6)</b>             | 39/189 (20.6%)                                                                  | 125/230 (54.3%)                                                                       | <b>82.8 (71.2-89.7)</b>           |
| Yes                                           | 57/427 (13.3%)                                                                  | 301/594 (50.7%)                                                                       | <b>87.1 (81.3-91.1)</b>             | 57/424 (13.4%)                                                                  | 297/585 (50.8%)                                                                       | <b>87.8 (82.1-91.7)</b>           |
| Pregnancy <sup>e</sup>                        |                                                                                 |                                                                                       |                                     |                                                                                 |                                                                                       |                                   |
| No                                            | 58/375 (15.5%)                                                                  | 234/472 (49.6%)                                                                       | <b>84.1 (76.8-89.1)</b>             | 58/374 (15.5%)                                                                  | 232/465 (49.9%)                                                                       | <b>85.9 (79.0-90.6)</b>           |
| Yes                                           | 2/14 (14.3%)                                                                    | 14/26 (53.8%)                                                                         | <b>90.6 (48.1-98.3)</b>             | 2/14 (14.3%)                                                                    | 14/26 (53.8%)                                                                         | <b>86.7 (23.3-97.7)</b>           |
| Immunocompromised <sup>f</sup>                |                                                                                 |                                                                                       |                                     |                                                                                 |                                                                                       |                                   |
| No                                            | 95/605 (15.7%)                                                                  | 426/822 (51.8%)                                                                       | <b>85.3 (80.4-88.9)</b>             | 95/599 (15.9%)                                                                  | 416/803 (51.8%)                                                                       | <b>85.4 (80.3-89.2)</b>           |
| Yes                                           | 1/15 (6.7%)                                                                     | 6/12 (50.0%)                                                                          | <b>94.6 (43.4-99.5)</b>             | 1/14 (7.1%)                                                                     | 6/12 (50.0%)                                                                          | <b>93.3 (25.0-99.4)</b>           |
| <b>Omicron-predominant period<sup>d</sup></b> |                                                                                 |                                                                                       |                                     |                                                                                 |                                                                                       |                                   |
| Age, years                                    |                                                                                 |                                                                                       |                                     |                                                                                 |                                                                                       |                                   |
| <50                                           | 1357/2029 (66.9%)                                                               | 2084/2370 (87.9%)                                                                     | <b>65.2 (58.7-70.7)</b>             | 1331/1987 (67.0%)                                                               | 2047/2330 (87.9%)                                                                     | <b>64.0 (57.1-69.9)</b>           |
| ≥50                                           | 438/610 (71.8%)                                                                 | 700/766 (91.4%)                                                                       | <b>65.9 (52.1-75.7)</b>             | 427/590 (72.4%)                                                                 | 684/747 (91.6%)                                                                       | <b>66.9 (53.1-76.7)</b>           |
| Underlying health conditions                  |                                                                                 |                                                                                       |                                     |                                                                                 |                                                                                       |                                   |
| No                                            | 580/769 (75.4%)                                                                 | 847/937 (90.4%)                                                                       | <b>56.3 (41.2-67.6)</b>             | 560/740 (75.7%)                                                                 | 816/902 (90.5%)                                                                       | <b>55.5 (39.4-67.3)</b>           |
| Yes                                           | 1228/1890 (65.0%)                                                               | 1960/2227 (88%)                                                                       | <b>68.2 (62.0-73.3)</b>             | 1198/1837 (65.2%)                                                               | 1915/2175 (88.0%)                                                                     | <b>67.2 (60.6-72.7)</b>           |
| Pregnancy <sup>e</sup>                        |                                                                                 |                                                                                       |                                     |                                                                                 |                                                                                       |                                   |
| No                                            | 1056/1602 (65.9%)                                                               | 1656/1890 (87.6%)                                                                     | <b>71.2 (65.5-75.9)</b>             | 1038/1573 (66.0%)                                                               | 1632/1863 (87.6%)                                                                     | <b>70.9 (65.0-75.8)</b>           |
| Yes                                           | 35/55 (63.6%)                                                                   | 56/63 (88.9%)                                                                         | <b>75.3 (34.5-90.7)</b>             | 35/55 (63.6%)                                                                   | 56/63 (88.9%)                                                                         | <b>74.3 (31.6-90.3)</b>           |
| Immunocompromised <sup>f</sup>                |                                                                                 |                                                                                       |                                     |                                                                                 |                                                                                       |                                   |
| No                                            | 1774/2612 (67.9%)                                                               | 2736/3088 (88.6%)                                                                     | <b>72.1 (67.7-75.8)</b>             | 1725/2533 (68.1%)                                                               | 2660/3001 (88.6%)                                                                     | <b>71.6 (67.0-75.6)</b>           |
| Yes                                           | 34/47 (72.3%)                                                                   | 71/76 (93.4%)                                                                         | <b>77.6 (31.4-92.7)</b>             | 33/44 (75.0%)                                                                   | 71/76 (93.4%)                                                                         | <b>74.7 (20.1-92.0)</b>           |

- a. Case-participants had symptomatic SARS-CoV-2 infection confirmed by antigen or nucleic acid amplification test; control-participants had a negative SARS-CoV-2 nucleic acid amplification test, with or without symptoms. Vaccination status was assigned on the test date as after a booster dose if  $\geq 14$  days after an mRNA booster dose that was administered  $\geq 5$  months after dose 2; the referent group for analysis was receipt of dose 2  $\geq 5$  months before the test date without a booster dose.
- b. Vaccine effectiveness was estimated as 100% multiplied by the reciprocal of the odds ratio for vaccination status by case/control status. To account for matching, for estimates by age group and underlying health conditions, we used a conditional model with clustering by two-week matching period and enrolling site; to account for sparse data in estimates by pregnancy status and immunocompromised status, broader clusters were used comprising four-week period and U.S. census region of enrolling site. Adjusted vaccine effectiveness included age group in years (18–29, 30–39, 40–49,  $\geq 50$ ), sex, race and ethnicity (White non-Hispanic, other), educational level (doctoral or professional degree, other), underlying health conditions (yes, no), known contact with a person with COVID-19 outside the workplace (yes, no).
- c. Observations restricted to participants included in the multivariable model (with no missing covariate information).
- d. The Delta-predominant period was defined as June 20, 2021–December 18, 2021; the Omicron-predominant period was defined as December 19, 2021, or later.
- e. Pregnancy was defined as pregnant on the test date. Analyses by pregnancy status were restricted to female participants age  $< 50$  years.
- f. Immunocompromised status was determined based on self-reported diagnoses or medical chart review. During the Omicron-predominant period, VE by a 3<sup>rd</sup> dose administered  $> 28$  days after dose 2 (instead of after  $> 150$  days) was 80.2% (39.4%–93.5%) among immunocompromised participants, compared with 71.5% (67.2%–75.2%) among other participants.

**Supplementary Table 10: Estimated Effectiveness of mRNA vaccines against COVID-19 among U.S. healthcare personnel who received two mRNA doses by variant-predominant period, October 2021–July 2022, using *unconditional* logistic regression**

| Characteristic                                       | Case-participants after a booster dose / All case-participants (%) <sup>a</sup> | Control-participants after a booster dose / All control-participants (%) <sup>a</sup> | Unadjusted VE (95% CI) <sup>b</sup> | Case-participants after a booster dose / All case-participants (%) <sup>c</sup> | Control-participants after a booster dose / All control-participants (%) <sup>c</sup> | Adjusted VE (95% CI) <sup>b</sup> |
|------------------------------------------------------|---------------------------------------------------------------------------------|---------------------------------------------------------------------------------------|-------------------------------------|---------------------------------------------------------------------------------|---------------------------------------------------------------------------------------|-----------------------------------|
| <b><u>Overall period<sup>d</sup></u></b>             |                                                                                 |                                                                                       |                                     |                                                                                 |                                                                                       |                                   |
| Age, years                                           |                                                                                 |                                                                                       |                                     |                                                                                 |                                                                                       |                                   |
| <50                                                  | 1433/2519 (56.9%)                                                               | 2397/2988 (80.2%)                                                                     | <b>72.4 (68.0-76.1)</b>             | 1407/2472 (56.9%)                                                               | 2356/2938 (80.2%)                                                                     | <b>71.8 (67.2-75.7)</b>           |
| ≥50                                                  | 458/739 (62.0%)                                                                 | 815/977 (83.4%)                                                                       | <b>70.9 (62.6-77.4)</b>             | 447/718 (62.3%)                                                                 | 797/954 (83.5%)                                                                       | <b>71.3 (62.9-77.8)</b>           |
| Underlying health conditions                         |                                                                                 |                                                                                       |                                     |                                                                                 |                                                                                       |                                   |
| No                                                   | 619/962 (64.3%)                                                                 | 978/1177 (83.1%)                                                                      | <b>71.5 (64.1-77.3)</b>             | 599/929 (64.5%)                                                                 | 941/1132 (83.1%)                                                                      | <b>70.6 (62.7-76.8)</b>           |
| Yes                                                  | 1285/2317 (55.5%)                                                               | 2261/2821 (80.1%)                                                                     | <b>72.6 (68.2-76.4)</b>             | 1255/2261 (55.5%)                                                               | 2212/2760 (80.1%)                                                                     | <b>72.0 (67.4-76.0)</b>           |
| Pregnancy <sup>e</sup>                               |                                                                                 |                                                                                       |                                     |                                                                                 |                                                                                       |                                   |
| No                                                   | 1114/1977 (56.3%)                                                               | 1890/2362 (80.0%)                                                                     | <b>70.8 (65.6-75.3)</b>             | 1096/1947 (56.3%)                                                               | 1864/2328 (80.1%)                                                                     | <b>70.8 (65.3-75.4)</b>           |
| Yes                                                  | 37/69 (53.6%)                                                                   | 70/89 (78.7%)                                                                         | <b>75.7 (49.1-88.4)</b>             | 37/69 (53.6%)                                                                   | 70/89 (78.7%)                                                                         | <b>73.9 (44.8-87.7)</b>           |
| Immunocompromised <sup>f</sup>                       |                                                                                 |                                                                                       |                                     |                                                                                 |                                                                                       |                                   |
| No                                                   | 1869/3217 (58.1%)                                                               | 3162/3910 (80.9%)                                                                     | <b>71.9 (67.9-75.4)</b>             | 1820/3132 (58.1%)                                                               | 3076/3804 (80.9%)                                                                     | <b>71.5 (67.3-75.2)</b>           |
| Yes                                                  | 35/62 (56.5%)                                                                   | 77/88 (87.5%)                                                                         | <b>82.9 (59.3-92.8)</b>             | 34/58 (58.6%)                                                                   | 77/88 (87.5%)                                                                         | <b>80.6 (53.0-92.0)</b>           |
| <b><u>Delta-predominant period<sup>d</sup></u></b>   |                                                                                 |                                                                                       |                                     |                                                                                 |                                                                                       |                                   |
| Age, years                                           |                                                                                 |                                                                                       |                                     |                                                                                 |                                                                                       |                                   |
| <50                                                  | 76/490 (15.5%)                                                                  | 313/618 (50.6%)                                                                       | <b>84.5 (78.5-88.9)</b>             | 76/485 (15.7%)                                                                  | 309/608 (50.8%)                                                                       | <b>85.2 (79.0-89.5)</b>           |
| ≥50                                                  | 20/129 (15.5%)                                                                  | 115/211 (54.5%)                                                                       | <b>88.9 (80.0-93.8)</b>             | 20/128 (15.6%)                                                                  | 113/207 (54.6%)                                                                       | <b>89.1 (80.0-94.0)</b>           |
| Underlying health conditions                         |                                                                                 |                                                                                       |                                     |                                                                                 |                                                                                       |                                   |
| No                                                   | 39/193 (20.2%)                                                                  | 131/240 (54.6%)                                                                       | <b>83.9 (74.2-90.0)</b>             | 39/189 (20.6%)                                                                  | 125/230 (54.3%)                                                                       | <b>83.5 (72.8-90.0)</b>           |
| Yes                                                  | 57/427 (13.3%)                                                                  | 301/594 (50.7%)                                                                       | <b>87.0 (81.4-91.0)</b>             | 57/424 (13.4%)                                                                  | 297/585 (50.8%)                                                                       | <b>87.4 (81.7-91.3)</b>           |
| Pregnancy <sup>e</sup>                               |                                                                                 |                                                                                       |                                     |                                                                                 |                                                                                       |                                   |
| No                                                   | 58/375 (15.5%)                                                                  | 234/472 (49.6%)                                                                       | <b>84.9 (77.7-89.8)</b>             | 58/374 (15.5%)                                                                  | 232/465 (49.9%)                                                                       | <b>87.0 (80.2-91.5)</b>           |
| Yes                                                  | 2/14 (14.3%)                                                                    | 14/26 (53.8%)                                                                         | <b>89.6 (39.0-98.2)</b>             | 2/14 (14.3%)                                                                    | 14/26 (53.8%)                                                                         | <b>83.9 (1.9-97.4)</b>            |
| Immunocompromised <sup>f</sup>                       |                                                                                 |                                                                                       |                                     |                                                                                 |                                                                                       |                                   |
| No                                                   | 95/605 (15.7%)                                                                  | 426/822 (51.8%)                                                                       | <b>85.7 (80.7-89.4)</b>             | 95/599 (15.9%)                                                                  | 416/803 (51.8%)                                                                       | <b>86.1 (80.9-89.8)</b>           |
| Yes                                                  | 1/15 (6.7%)                                                                     | 6/12 (50.0%)                                                                          | <b>94.8 (39.9-99.5)</b>             | 1/14 (7.1%)                                                                     | 6/12 (50.0%)                                                                          | <b>93.8 (25.6-99.5)</b>           |
| <b><u>Omicron-predominant period<sup>d</sup></u></b> |                                                                                 |                                                                                       |                                     |                                                                                 |                                                                                       |                                   |
| Age, years                                           |                                                                                 |                                                                                       |                                     |                                                                                 |                                                                                       |                                   |
| <50                                                  | 1357/2029 (66.9%)                                                               | 2084/2370 (87.9%)                                                                     | <b>65.6 (59.2-70.9)</b>             | 1331/1987 (67%)                                                                 | 2047/2330 (87.9%)                                                                     | <b>64.3 (57.6-70.0)</b>           |
| ≥50                                                  | 438/610 (71.8%)                                                                 | 700/766 (91.4%)                                                                       | <b>66.0 (52.6-75.6)</b>             | 427/590 (72.4%)                                                                 | 684/747 (91.6%)                                                                       | <b>67.1 (53.8-76.6)</b>           |
| Underlying health conditions                         |                                                                                 |                                                                                       |                                     |                                                                                 |                                                                                       |                                   |
| No                                                   | 580/769 (75.4%)                                                                 | 847/937 (90.4%)                                                                       | <b>59.2 (45.3-69.5)</b>             | 560/740 (75.7%)                                                                 | 816/902 (90.5%)                                                                       | <b>58.3 (43.6-69.2)</b>           |
| Yes                                                  | 1228/1890 (65.0%)                                                               | 1960/2227 (88.0%)                                                                     | <b>67.7 (61.5-72.8)</b>             | 1198/1837 (65.2%)                                                               | 1915/2175 (88.0%)                                                                     | <b>66.8 (60.3-72.3)</b>           |
| Pregnancy <sup>e</sup>                               |                                                                                 |                                                                                       |                                     |                                                                                 |                                                                                       |                                   |
| No                                                   | 1056/1602 (65.9%)                                                               | 1656/1890 (87.6%)                                                                     | <b>64.4 (57.0-70.6)</b>             | 1038/1573 (66%)                                                                 | 1632/1863 (87.6%)                                                                     | <b>63.8 (56.0-70.2)</b>           |
| Yes                                                  | 35/55 (63.6%)                                                                   | 56/63 (88.9%)                                                                         | <b>70.5 (19.6-89.1)</b>             | 35/55 (63.6%)                                                                   | 56/63 (88.9%)                                                                         | <b>69.7 (16.2-89.0)</b>           |
| Immunocompromised <sup>f</sup>                       |                                                                                 |                                                                                       |                                     |                                                                                 |                                                                                       |                                   |
| No                                                   | 1774/2612 (67.9%)                                                               | 2736/3088 (88.6%)                                                                     | <b>65.4 (59.7-70.3)</b>             | 1725/2533 (68.1%)                                                               | 2660/3001 (88.6%)                                                                     | <b>64.9 (58.8-70.0)</b>           |
| Yes                                                  | 34/47 (72.3%)                                                                   | 71/76 (93.4%)                                                                         | <b>70.6 (3.5-91.0)</b>              | 33/44 (75.0%)                                                                   | 71/76 (93.4%)                                                                         | <b>65.6 (-17.1-89.9)</b>          |

- a. Case-participants had symptomatic SARS-CoV-2 infection confirmed by antigen or nucleic acid amplification test; control-participants had a negative SARS-CoV-2 nucleic acid amplification test, with or without symptoms. Vaccination status was assigned on the test date as after a booster dose if  $\geq 14$  days after an mRNA booster dose that was administered  $\geq 5$  months after dose 2; the referent group for analysis was receipt of dose 2  $\geq 5$  months before the test date without a booster dose.
- b. Vaccine effectiveness was estimated as 100% multiplied by the reciprocal of the odds ratio for vaccination status by case/control status. Unconditional adjusted vaccine effectiveness estimates included enrolling site, two-week period, age group in years (18–29, 30–39, 40–49,  $\geq 50$ ), sex, race and ethnicity (White non-Hispanic, other), educational level (doctoral or professional degree, other), underlying health conditions (yes, no), known contact with a person with COVID-19 outside the workplace (yes, no).
- c. Observations restricted to participants included in the multivariable model (with no missing covariate information).
- d. The Delta-predominant period was defined as June 20, 2021–December 18, 2021; the Omicron-predominant period was defined as December 19, 2021, or later.
- e. Pregnancy was defined as pregnant on the test date. Analyses by pregnancy status were restricted to female participants age  $< 50$  years.
- f. Immunocompromised status was determined based on self-reported diagnoses or medical chart review. During the Omicron-predominant period, VE by a 3<sup>rd</sup> dose administered  $> 28$  days after dose 2 (instead of after  $> 150$  days) was 72.6% (10.7%–91.6%) among immunocompromised participants, compared with 65.0% (59.4%–69.8%) among other participants.

**Supplementary Table 11: Supportive analyses: Estimated Effectiveness of an mRNA Booster Dose against COVID-19 among U.S. healthcare personnel who received two mRNA doses using different models and by subgroup, October 2021–July 2022**

| Characteristic                               | Case-participants after a booster dose / All case-participants (%) <sup>a</sup> | Control-participants after a booster dose / All control-participants (%) <sup>a</sup> | Adjusted VE (95% CI) <sup>b</sup> |
|----------------------------------------------|---------------------------------------------------------------------------------|---------------------------------------------------------------------------------------|-----------------------------------|
| <b>Model type</b>                            |                                                                                 |                                                                                       |                                   |
| Unconditional, 2-week period by site         | 1854/3190 (58.1%)                                                               | 3153/3892 (81.0%)                                                                     | <b>71.7 (67.5-75.3)</b>           |
| Conditional, 1-week strata by site           | 1854/3190 (58.1%)                                                               | 3153/3892 (81.0%)                                                                     | <b>71.0 (66.5-75.0)</b>           |
| Conditional, 2-week strata by site           | 1854/3190 (58.1%)                                                               | 3153/3892 (81.0%)                                                                     | <b>71.1 (66.7-75.0)</b>           |
| Conditional, 4-week strata by site           | 1854/3190 (58.1%)                                                               | 3153/3892 (81.0%)                                                                     | <b>70.8 (66.4-74.7)</b>           |
| Conditional, 4-week strata by HHS region     | 1854/3190 (58.1%)                                                               | 3153/3892 (81.0%)                                                                     | <b>74.6 (70.9-77.8)</b>           |
| Conditional, 4-week strata by USC region     | 1854/3190 (58.1%)                                                               | 3153/3892 (81.0%)                                                                     | <b>75.3 (71.8-78.3)</b>           |
| <b>Sensitivity analyses</b>                  |                                                                                 |                                                                                       |                                   |
| Nucleic acid amplification test results only | 1778/3034 (58.6%)                                                               | 3153/3892 (81.0%)                                                                     | <b>70.7 (66.2-74.7)</b>           |
| Symptomatic illness                          | 1854/3190 (58.1%)                                                               | 2580/3234 (79.8%)                                                                     | <b>70.5 (65.7-74.6)</b>           |
| Interview during 14–60 days after test date  | 1831/3144 (58.2%)                                                               | 2968/3624 (81.9%)                                                                     | <b>70.0 (65.3-74.1)</b>           |
| <b>Subgroup analyses</b>                     |                                                                                 |                                                                                       |                                   |
| Sex                                          |                                                                                 |                                                                                       |                                   |
| Male                                         | 377/603 (62.5%)                                                                 | 571/692 (82.5%)                                                                       | <b>69.6 (58.9-77.5)</b>           |
| Female                                       | 1477/2587 (57.1%)                                                               | 2582/3200 (80.7%)                                                                     | <b>71.4 (66.7-75.4)</b>           |
| Race and ethnicity                           |                                                                                 |                                                                                       |                                   |
| White, non-Hispanic                          | 1463/2466 (59.3%)                                                               | 2605/3184 (81.8%)                                                                     | <b>71.5 (66.6-75.6)</b>           |
| Other race or ethnicity                      | 391/724 (54.0%)                                                                 | 548/708 (77.4%)                                                                       | <b>70.0 (60.8-77.0)</b>           |
| Educational level                            |                                                                                 |                                                                                       |                                   |
| No professional or doctoral degree           | 1436/2654 (54.1%)                                                               | 2381/3033 (78.5%)                                                                     | <b>71.5 (67.0-75.5)</b>           |
| Professional or doctoral degree              | 418/536 (78.0%)                                                                 | 772/859 (89.9%)                                                                       | <b>67.6 (53.6-77.4)</b>           |
| Anticipated level of patient contact         |                                                                                 |                                                                                       |                                   |
| Substantial                                  | 673/1162 (57.9%)                                                                | 1238/1512 (81.9%)                                                                     | <b>74.1 (68.1-79.1)</b>           |
| Minimal, moderate, or unknown                | 1181/2028 (58.2%)                                                               | 1915/2380 (80.5%)                                                                     | <b>69.0 (63.3-73.9)</b>           |
| Works at hospital or ED?                     |                                                                                 |                                                                                       |                                   |
| No                                           | 491/836 (58.7%)                                                                 | 988/1212 (81.5%)                                                                      | <b>72.2 (64.8-78.1)</b>           |
| Yes                                          | 1363/2354 (57.9%)                                                               | 2165/2680 (80.8%)                                                                     | <b>70.8 (65.6-75.1)</b>           |
| Reason for testing                           |                                                                                 |                                                                                       |                                   |
| Symptoms                                     | 1578/2739 (57.6%)                                                               | 2201/2761 (79.7%)                                                                     | <b>70.5 (65.4-74.9)</b>           |
| Exposure without symptoms                    | 213/349 (61.0%)                                                                 | 278/340 (81.8%)                                                                       | <b>71.0 (57.1-80.4)</b>           |
| Other                                        | 63/102 (61.8%)                                                                  | 101/133 (75.9%)                                                                       | <b>60.4 (24.5-79.3)</b>           |
| No. symptoms if symptomatic                  |                                                                                 |                                                                                       |                                   |
| 1-3                                          | 526/736 (71.5%)                                                                 | 1434/1756 (81.7%)                                                                     | <b>53.5 (40.9-63.4)</b>           |
| >3                                           | 1274/2339 (54.5%)                                                               | 1135/1464 (77.5%)                                                                     | <b>69.9 (63.7-75.1)</b>           |
| Fever, if symptomatic                        |                                                                                 |                                                                                       |                                   |
| No                                           | 1000/1461 (68.4%)                                                               | 2502/3020 (82.8%)                                                                     | <b>60.4 (52.5-67.0)</b>           |
| Yes                                          | 854/1729 (49.4%)                                                                | 651/872 (74.7%)                                                                       | <b>67.4 (59.6-73.7)</b>           |

a. Case-participants had symptomatic SARS-CoV-2 infection confirmed by antigen or nucleic acid amplification test; control-participants had a negative SARS-CoV-2 nucleic acid amplification test, with or without symptoms. Vaccination status was assigned on the test date as after a booster dose if  $\geq 14$  days after an mRNA booster dose that was administered  $\geq 5$  months after dose 2; the referent group for analysis was receipt of dose 2  $\geq 5$  months before the test date without a booster dose.

b. Vaccine effectiveness was estimated as 100% multiplied by the reciprocal of the odds ratio for vaccination status by case/control status. Unless otherwise specified, a conditional model was used with a cluster of two-week matching period and enrolling site to account for matching. Adjusted vaccine effectiveness included age group in years (18–29, 30–39, 40–49,  $\geq 50$ ), sex, race and ethnicity (White non-Hispanic, other), educational level (doctoral or professional degree, other), underlying health conditions (yes, no), known contact with a person with COVID-19 outside the workplace (yes, no).

**Supplementary Table 12: Estimated vaccine effectiveness of an mRNA booster dose against COVID-19 among U.S. healthcare personnel compared with unvaccinated status, by variant-predominant period, October 2021–July 2022**

| Characteristic                     | Case-participants after a booster dose / Case-participants after a booster or unvaccinated (%) <sup>a</sup> | Control-participants after a booster dose / Control-participants after a booster or unvaccinated (%) <sup>a</sup> | Unadjusted VE (95% CI) <sup>b</sup> | Case-participants after a booster dose / Case-participants after a booster or unvaccinated (%) <sup>c</sup> | Control-participants after a booster dose / Control-participants after a booster or unvaccinated (%) <sup>c</sup> | Adjusted VE (95% CI) <sup>b</sup> |
|------------------------------------|-------------------------------------------------------------------------------------------------------------|-------------------------------------------------------------------------------------------------------------------|-------------------------------------|-------------------------------------------------------------------------------------------------------------|-------------------------------------------------------------------------------------------------------------------|-----------------------------------|
| <b>Any period <sup>d</sup></b>     |                                                                                                             |                                                                                                                   |                                     |                                                                                                             |                                                                                                                   |                                   |
| Booster product                    |                                                                                                             |                                                                                                                   |                                     |                                                                                                             |                                                                                                                   |                                   |
| Any mRNA                           | 1908/1993 (95.7%)                                                                                           | 3241/3295 (98.4%)                                                                                                 | <b>73.9 (61.2-82.5)</b>             | 1858/1937 (95.9%)                                                                                           | 3155/3204 (98.5%)                                                                                                 | <b>76.0 (63.7-84.2)</b>           |
| Pfizer BioNTech                    | 1415/1500 (94.3%)                                                                                           | 2396/2450 (97.8%)                                                                                                 | <b>73.0 (59.8-81.9)</b>             | 1376/1455 (94.6%)                                                                                           | 2329/2378 (97.9%)                                                                                                 | <b>75.1 (62.3-83.6)</b>           |
| Moderna                            | 396/481 (82.3%)                                                                                             | 708/762 (92.9%)                                                                                                   | <b>70.7 (52.4-81.9)</b>             | 392/471 (83.2%)                                                                                             | 693/742 (93.4%)                                                                                                   | <b>74.4 (56.8-84.8)</b>           |
| Days since booster dose            |                                                                                                             |                                                                                                                   |                                     |                                                                                                             |                                                                                                                   |                                   |
| <60                                | 363/448 (81.0%)                                                                                             | 846/900 (94.0%)                                                                                                   | <b>78.8 (67.8-86.1)</b>             | 357/436 (81.9%)                                                                                             | 818/867 (94.3%)                                                                                                   | <b>80.3 (69.4-87.3)</b>           |
| 60-119                             | 1009/1094 (92.2%)                                                                                           | 1537/1591 (96.6%)                                                                                                 | <b>65.1 (44.8-77.9)</b>             | 984/1063 (92.6%)                                                                                            | 1506/1555 (96.8%)                                                                                                 | <b>68.7 (49.4-80.6)</b>           |
| ≥120                               | 536/621 (86.3%)                                                                                             | 858/912 (94.1%)                                                                                                   | <sup>e</sup>                        | 517/596 (86.7%)                                                                                             | 831/880 (94.4%)                                                                                                   | <sup>e</sup>                      |
| <b>Delta period <sup>d</sup></b>   |                                                                                                             |                                                                                                                   |                                     |                                                                                                             |                                                                                                                   |                                   |
| Booster product                    |                                                                                                             |                                                                                                                   |                                     |                                                                                                             |                                                                                                                   |                                   |
| Any mRNA                           | 96/144 (66.7%)                                                                                              | 432/460 (93.9%)                                                                                                   | <b>89.3 (80.3-94.2)</b>             | 96/140 (68.6%)                                                                                              | 422/448 (94.2%)                                                                                                   | <b>89.0 (79.0-94.3)</b>           |
| Pfizer BioNTech                    | 76/124 (61.3%)                                                                                              | 342/370 (92.4%)                                                                                                   | <b>89.0 (79.5-94.0)</b>             | 76/120 (63.3%)                                                                                              | 335/361 (92.8%)                                                                                                   | <b>88.4 (77.6-94.0)</b>           |
| Moderna                            | 17/65 (26.2%)                                                                                               | 76/104 (73.1%)                                                                                                    | <b>91.3 (76.2-96.8)</b>             | 17/61 (27.9%)                                                                                               | 73/99 (73.7%)                                                                                                     | <b>94.7 (80.5-98.5)</b>           |
| Days since booster dose            |                                                                                                             |                                                                                                                   |                                     |                                                                                                             |                                                                                                                   |                                   |
| <60                                | 68/116 (58.6%)                                                                                              | 340/368 (92.4%)                                                                                                   | <b>89.6 (80.8-94.4)</b>             | 68/112 (60.7%)                                                                                              | 331/357 (92.7%)                                                                                                   | <b>89.8 (80.1-94.8)</b>           |
| 60-119                             | 28/76 (36.8%)                                                                                               | 92/120 (76.7%)                                                                                                    | <b>88.1 (67.5-95.7)</b>             | 28/72 (38.9%)                                                                                               | 91/117 (77.8%)                                                                                                    | <b>88.3 (65.4-96.0)</b>           |
| ≥120                               | 0/48 (0%)                                                                                                   | 0/28 (0%)                                                                                                         | <sup>e</sup>                        | 0/44 (0%)                                                                                                   | 0/26 (0%)                                                                                                         | <sup>e</sup>                      |
| <b>Omicron period <sup>d</sup></b> |                                                                                                             |                                                                                                                   |                                     |                                                                                                             |                                                                                                                   |                                   |
| Booster product                    |                                                                                                             |                                                                                                                   |                                     |                                                                                                             |                                                                                                                   |                                   |
| Any mRNA                           | 1812/1849 (98.0%)                                                                                           | 2809/2835 (99.1%)                                                                                                 | <b>49.3 (15.5-69.5)</b>             | 1762/1797 (98.1%)                                                                                           | 2733/2756 (99.2%)                                                                                                 | <b>56.7 (25.6-74.8)</b>           |
| Pfizer BioNTech                    | 1339/1376 (97.3%)                                                                                           | 2054/2080 (98.8%)                                                                                                 | <b>48.1 (13.5-68.8)</b>             | 1300/1335 (97.4%)                                                                                           | 1994/2017 (98.9%)                                                                                                 | <b>54.7 (22.1-73.7)</b>           |
| Moderna                            | 379/416 (91.1%)                                                                                             | 632/658 (96.0%)                                                                                                   | <b>52.6 (16.4-73.1)</b>             | 375/410 (91.5%)                                                                                             | 620/643 (96.4%)                                                                                                   | <b>60.9 (27.2-79.0)</b>           |
| Days since booster dose            |                                                                                                             |                                                                                                                   |                                     |                                                                                                             |                                                                                                                   |                                   |
| <60                                | 295/332 (88.9%)                                                                                             | 506/532 (95.1%)                                                                                                   | <b>59.1 (27.9-76.8)</b>             | 289/324 (89.2%)                                                                                             | 487/510 (95.5%)                                                                                                   | <b>64.9 (36.0-80.8)</b>           |
| 60-119                             | 981/1018 (96.4%)                                                                                            | 1445/1471 (98.2%)                                                                                                 | <b>52.7 (19.8-72.1)</b>             | 956/991 (96.5%)                                                                                             | 1415/1438 (98.4%)                                                                                                 | <b>58.0 (26.7-75.9)</b>           |
| ≥120                               | 536/573 (93.5%)                                                                                             | 858/884 (97.1%)                                                                                                   | <sup>e</sup>                        | 517/552 (93.7%)                                                                                             | 831/854 (97.3%)                                                                                                   | <sup>e</sup>                      |

a. Case-participants had symptomatic SARS-CoV-2 infection confirmed by antigen or nucleic acid amplification test; control-participants had a negative SARS-CoV-2 nucleic acid amplification test, with or without symptoms. Vaccination status was assigned on the test date as after a booster dose if ≥14 days after an mRNA booster dose that was administered ≥5 months after dose 2. The referent group was unvaccinated.

b. Vaccine effectiveness was estimated as 100% multiplied by the reciprocal of the odds ratio for vaccination status by case/control status. A conditional model was used with a cluster of two-week matching period and enrolling site to account for matching. Adjusted vaccine effectiveness included age group in years (18–29, 30–39, 40–49, ≥50), sex, race and ethnicity (White non-Hispanic, other), educational level (doctoral or professional degree, other), underlying health conditions (yes, no), known contact with a person with COVID-19 outside the workplace (yes, no).

c. Observations restricted to participants included in the multivariable model (with no missing covariate information).

d. The Delta-predominant period was defined as June 20, 2021–December 18, 2021; the Omicron-predominant period was defined as December 19, 2021, or later.

e. Estimates not shown if not calculable (for example, if zero observations) or if confidence intervals were >100%.

**Supplementary Table 13: Estimated effectiveness of a second mRNA dose against COVID-19 among U.S. healthcare personnel compared with unvaccinated status, by variant-predominant period, January–December, 2021**

| Characteristic                      | Case-participants after dose 2 / Total (%) <sup>a</sup> | Control-participants after dose 2 / Total (%) <sup>a</sup> | Unadjusted VE (95% CI) <sup>b</sup> | Case-participants after dose 2 / Total (%) <sup>c</sup> | Control-participants after dose 2 / Total (%) <sup>c</sup> | Adjusted VE (95% CI) <sup>b</sup> |
|-------------------------------------|---------------------------------------------------------|------------------------------------------------------------|-------------------------------------|---------------------------------------------------------|------------------------------------------------------------|-----------------------------------|
| <b>Pre-Delta period<sup>d</sup></b> |                                                         |                                                            |                                     |                                                         |                                                            |                                   |
| Vaccine product                     |                                                         |                                                            |                                     |                                                         |                                                            |                                   |
| Any mRNA                            | 195/885 (22.0%)                                         | 1116/1695 (65.8%)                                          | <b>89.0 (86.1-91.3)</b>             | 188/853 (22%)                                           | 1084/1652 (65.6%)                                          | <b>88.7 (85.2-91.4)</b>           |
| Pfizer BioNTech                     | 166/856 (19.4%)                                         | 845/1424 (59.3%)                                           | <b>87.2 (83.5-90.0)</b>             | 161/826 (19.5%)                                         | 823/1391 (59.2%)                                           | <b>86.3 (81.8-89.6)</b>           |
| Moderna                             | 29/719 (4%)                                             | 271/850 (31.9%)                                            | <b>93.6 (89.9-96.0)</b>             | 27/692 (3.9%)                                           | 261/829 (31.5%)                                            | <b>93.8 (89.8-96.3)</b>           |
| Days since dose 2                   |                                                         |                                                            |                                     |                                                         |                                                            |                                   |
| <90                                 | 112/802 (14%)                                           | 763/1342 (56.9%)                                           | <b>89.5 (86.3-91.9)</b>             | 107/772 (13.9%)                                         | 743/1311 (56.7%)                                           | <b>89.5 (85.8-92.2)</b>           |
| 90-179                              | 83/773 (10.7%)                                          | 353/932 (37.9%)                                            | <b>84.8 (77.5-89.8)</b>             | 81/746 (10.9%)                                          | 341/909 (37.5%)                                            | <b>81.7 (71.7-88.1)</b>           |
| 180-269                             | 0/690 (0%)                                              | 0/579 (0%)                                                 | <sup>e</sup>                        | 0/665 (0%)                                              | 0/568 (0%)                                                 | <sup>e</sup>                      |
| 270-359                             | 0/690 (0%)                                              | 0/579 (0%)                                                 | <sup>e</sup>                        | 0/665 (0%)                                              | 0/568 (0%)                                                 | <sup>e</sup>                      |
| <b>Delta period<sup>d</sup></b>     |                                                         |                                                            |                                     |                                                         |                                                            |                                   |
| Vaccine product                     |                                                         |                                                            |                                     |                                                         |                                                            |                                   |
| Any mRNA                            | 1721/1950 (88.3%)                                       | 2565/2710 (94.6%)                                          | <b>59.4 (49.2-67.6)</b>             | 1692/1909 (88.6%)                                       | 2486/2622 (94.8%)                                          | <b>57.6 (46.1-66.7)</b>           |
| Pfizer BioNTech                     | 1338/1567 (85.4%)                                       | 1925/2070 (93.0%)                                          | <b>57.9 (47.2-66.5)</b>             | 1317/1534 (85.9%)                                       | 1867/2003 (93.2%)                                          | <b>55.3 (42.9-65.0)</b>           |
| Moderna                             | 382/611 (62.5%)                                         | 636/781 (81.4%)                                            | <b>65.9 (55.3-74.0)</b>             | 374/591 (63.3%)                                         | 615/751 (81.9%)                                            | <b>65.5 (53.5-74.4)</b>           |
| Days since dose 2                   |                                                         |                                                            |                                     |                                                         |                                                            |                                   |
| <90                                 | 44/273 (16.1%)                                          | 90/235 (38.3%)                                             | <b>71.6 (55.0-82.1)</b>             | 43/260 (16.5%)                                          | 89/225 (39.6%)                                             | <b>73.9 (57.7-83.9)</b>           |
| 90-179                              | 231/460 (50.2%)                                         | 473/618 (76.5%)                                            | <b>67.8 (57.5-75.5)</b>             | 220/437 (50.3%)                                         | 459/595 (77.1%)                                            | <b>69.2 (58.5-77.1)</b>           |
| 180-269                             | 1073/1302 (82.4%)                                       | 1776/1921 (92.5%)                                          | <b>59.3 (48.5-67.8)</b>             | 1060/1277 (83.0%)                                       | 1716/1852 (92.7%)                                          | <b>54.6 (41.4-64.9)</b>           |
| 270-359                             | 373/602 (62%)                                           | 226/371 (60.9%)                                            | <b>6.0 (-51.2-41.6)</b>             | 369/586 (63.0%)                                         | 222/358 (62.0%)                                            | <sup>e</sup>                      |

- a. Case-participants had symptomatic SARS-CoV-2 infection confirmed by antigen or nucleic acid amplification test; control-participants had a negative SARS-CoV-2 nucleic acid amplification test, with or without symptoms. Vaccination status was assigned on the test date as after dose 2 if  $\geq 14$  days after a second mRNA booster dose, with unvaccinated participants as the referent group.
- b. Vaccine effectiveness was estimated as 100% multiplied by the reciprocal of the odds ratio for vaccination status by case/control status. A conditional model was used with a cluster of two-week matching period and enrolling site to account for matching. Adjusted vaccine effectiveness included age group in years (18–29, 30–39, 40–49,  $\geq 50$ ), sex, race and ethnicity (White non-Hispanic, other), educational level (doctoral or professional degree, other), underlying health conditions (yes, no), known contact with a person with COVID-19 outside the workplace (yes, no).
- c. Observations restricted to participants included in the multivariable model (with no missing covariate information).
- d. The pre-Delta period was defined as January 2021–June 19, 2021; the Delta-predominant period was defined as June 20, 2021–December 18, 2021.
- e. Estimates not shown if not calculable (for example, if zero observations) or if confidence intervals were  $>100\%$ .



**Supplementary Table 14: Estimated effectiveness of a second mRNA dose against COVID-19 among U.S. healthcare personnel compared with unvaccinated status, by variant-predominant period, October 2021–July 2022**

| Characteristic                                               | Case-participants after dose 2 / Total (%) <sup>a</sup> | Control-participants after dose 2 / Total (%) <sup>a</sup> | Unadjusted VE (95% CI) <sup>b</sup> | Case-participants after dose 2 / Total (%) <sup>c</sup> | Control-participants after dose 2 / Total (%) <sup>c</sup> | Adjusted VE (95% CI) <sup>b</sup> |
|--------------------------------------------------------------|---------------------------------------------------------|------------------------------------------------------------|-------------------------------------|---------------------------------------------------------|------------------------------------------------------------|-----------------------------------|
| <b>Delta period included in primary analysis<sup>d</sup></b> |                                                         |                                                            |                                     |                                                         |                                                            |                                   |
| Vaccine product                                              |                                                         |                                                            |                                     |                                                         |                                                            |                                   |
| Any mRNA                                                     | 566/614 (92.2%)                                         | 455/483 (94.2%)                                            | <b>28.7 (-17.2-56.7)</b>            | 557/601 (92.7%)                                         | 445/471 (94.5%)                                            | <b>26.1 (-25.7-56.5)</b>          |
| Pfizer BioNTech                                              | 381/429 (88.8%)                                         | 288/316 (91.1%)                                            | <b>25.7 (-23.5-55.3)</b>            | 374/418 (89.5%)                                         | 282/308 (91.6%)                                            | <b>20.5 (-37.0-53.9)</b>          |
| Moderna                                                      | 184/232 (79.3%)                                         | 165/193 (85.5%)                                            | <b>38.7 (-7.6-65.1)</b>             | 182/226 (80.5%)                                         | 161/187 (86.1%)                                            | <b>47.0 (1.7-71.4)</b>            |
| Days since dose 2 <sup>e</sup>                               |                                                         |                                                            |                                     |                                                         |                                                            |                                   |
| ≤150                                                         | 42/90 (46.7%)                                           | 53/81 (65.4%)                                              | <b>59.1 (19.2-79.3)</b>             | 40/84 (47.6%)                                           | 52/78 (66.7%)                                              | <b>56.8 (5.5-80.2)</b>            |
| >150                                                         | 524/572 (91.6%)                                         | 402/430 (93.5%)                                            | <b>23.4 (-26.4-53.6)</b>            | 517/561 (92.2%)                                         | 393/419 (93.8%)                                            | <b>19.2 (-37.8-52.7)</b>          |
| <b>Omicron period<sup>d</sup></b>                            |                                                         |                                                            |                                     |                                                         |                                                            |                                   |
| Vaccine product                                              |                                                         |                                                            |                                     |                                                         |                                                            |                                   |
| Any mRNA                                                     | 1038/1075 (96.6%)                                       | 434/460 (94.3%)                                            | f                                   | 997/1032 (96.6%)                                        | 417/440 (94.8%)                                            | f                                 |
| Pfizer BioNTech                                              | 764/801 (95.4%)                                         | 301/327 (92%)                                              | f                                   | 729/764 (95.4%)                                         | 289/312 (92.6%)                                            | f                                 |
| Moderna                                                      | 264/301 (87.7%)                                         | 131/157 (83.4%)                                            | f                                   | 258/293 (88.1%)                                         | 126/149 (84.6%)                                            | f                                 |
| Days since dose 2 <sup>e</sup>                               |                                                         |                                                            |                                     |                                                         |                                                            |                                   |
| ≤150                                                         | 187/224 (83.5%)                                         | 77/103 (74.8%)                                             | f                                   | 178/213 (83.6%)                                         | 71/94 (75.5%)                                              | f                                 |
| >150                                                         | 851/888 (95.8%)                                         | 357/383 (93.2%)                                            | f                                   | 819/854 (95.9%)                                         | 346/369 (93.8%)                                            | f                                 |

a. Case-participants had symptomatic SARS-CoV-2 infection confirmed by antigen or nucleic acid amplification test; control-participants had a negative SARS-CoV-2 nucleic acid amplification test, with or without symptoms. Vaccination status was assigned on the test date as after dose 2 if ≥14 days after a second mRNA booster dose, with unvaccinated participants as the referent group.

b. Vaccine effectiveness was estimated as 100% multiplied by the reciprocal of the odds ratio for vaccination status by case/control status. A conditional model was used with a cluster of two-week matching period and enrolling site to account for matching. Adjusted vaccine effectiveness included age group in years (18–29, 30–39, 40–49, ≥50), sex, race and ethnicity (White non-Hispanic, other), educational level (doctoral or professional degree, other), underlying health conditions (yes, no), known contact with a person with COVID-19 outside the workplace (yes, no).

c. Observations restricted to participants included in the multivariable model (with no missing covariate information).

d. The Delta-predominant period included in the primary analysis was defined as October 9–December 18, 2021; the Omicron-predominant period was defined as December 19, 2021, or later.

e. During the Delta-predominant period, the median days (range) since dose 2 was 84 (16–149) for participants classified as ≤150 days, and 281 (151–345) for participants classified as >150 days; during the Omicron-predominant period, the median days (range) since dose 2 was 109 (17–150) for participants classified as ≤150 days, and 332 (152–557) for participants classified as >150 days.

f. Estimates not shown if not calculable (for example, if zero observations) or if confidence intervals were >100%.

**Supplementary Table 15: Collaborators and other team members acknowledged by site**

| <b>Site or other affiliation</b>                                                          | <b>Study team members acknowledged</b>                                                                                                                                                                                                                     |
|-------------------------------------------------------------------------------------------|------------------------------------------------------------------------------------------------------------------------------------------------------------------------------------------------------------------------------------------------------------|
| Baystate Medical Center, Springfield, Massachusetts                                       | Kye Poronsky, Jillian Tozloski, Abigail Girardin, Lili O'Brian, Laura McCormick, Jillian Tozloski, Abigail Girardin, Lili O'Brian, Laura McCormick                                                                                                         |
| Brigham and Women's Hospital, Boston, Massachusetts                                       | Dean M. Hashimoto, Karen Hopcia, Theresa M. Orechia, Alexander B. Hill, Gabrielle Donohoe, Lily R. Johnsky, Jordyn M. Fofi, Steven E. Miyawaki, Jenson J. Kaithamattam, Michelle Chung, Nikita A. Umale, Mohammad Adrian Hasdianda, Guruprasad Jambaulikar |
| Centers for Disease Control & Prevention, Atlanta, Georgia                                | Chris Watts, David McCormick, Sankan Nyanseor, Matthew McCullough, Wei Xing, Meredith McMorrow, Yunmi Chung, Anna Yousaf, Ryan Gierke, Jennifer L. Farrar, Jennifer Onukwube, Cheri Grigg, Shelley Magill                                                  |
| Jackson Memorial Hospital, Miami, Florida                                                 | Tala Teymour, Maria Davila, Suzette Fernandez                                                                                                                                                                                                              |
| Maryland Emerging Infections Program, Maryland Department of Health, Baltimore, Maryland  | Kaytlynn Marceaux-Galli, Rebecca Perlmutter                                                                                                                                                                                                                |
| New Mexico Emerging Infections Program, University of New Mexico, New Mexico              | Melissa Christian, Kristina Flores, Helga Gonzales, Savannah Pierson, Yadira Salazar-Sanchez, Sarah Shrum Davis, Marla Sievers                                                                                                                             |
| Public Health Division, Oregon Health Authority, Oregon                                   | Rebecca Pierce, Eric Hall, Monika Samper, Nora Jameson, Youssra Yemmas, Laura LaLonde, Lauren Adrian                                                                                                                                                       |
| Thomas Jefferson University Hospital, Philadelphia, Pennsylvania                          | Zachary Mankoff                                                                                                                                                                                                                                            |
| University Medical Center New Orleans, LSU Health Sciences Center, New Orleans, Louisiana | Michelle St. Romain, Stacey Wisniewski, Gaynell Bernadas-Hunt, Alexander Vandeerlin, Domnic Bett, Cathryn Leggio, Stacey Wisniewski, Gaynell Bernadas-Hunt, Alexander Vandeerlin, Domnic Bett, Cathryn Leggio                                              |
| University of Alabama at Birmingham, Birmingham, Alabama                                  | Joel Rodgers, Nivedita Patkar, Delissa Tidwell-Hand, Whitney Covington                                                                                                                                                                                     |
| University of California Los Angeles, California                                          | Susana Hacopian, Vincent E. Yu, Reynaldo Padilla, Cynthia Delgado, Madeleine Manahan, Melanie Potts, Jessica Kuo, Alyssa Fowlds, Lidia Choxom, Amy Dakos, Denise Tritt                                                                                     |
| University of Chicago, Chicago, Illinois                                                  | Geneatra Green, Rachel Marrs, Katherine Schneider                                                                                                                                                                                                          |
| University of Iowa, Iowa City, Iowa                                                       | Kelli Wallace, Bradley Clinansmith, Alysia Horcher, Karin Hoth, Cathy Fairfield, Katherine Schneider, Shannon Landers, Karin Hoth, Cathy Fairfield, Katherine Schneider, Shannon Landers, Eliezer Santos, Nathan R. Kramer, Fred Ullrich                   |
| University of Massachusetts Chan Medical School, Worcester, Massachusetts                 | Abigail Lopes, Morgan Nelson, Virginia Mangolds                                                                                                                                                                                                            |
| University of Mississippi Medical Center, Jackson, Mississippi                            | James Galbraith, Lucia Solis, Rebekah Peacock, Bhagyashri Navalkele, Alan Jones                                                                                                                                                                            |
| University of Missouri-Kansas City, Kansas City, Missouri                                 | Amy M. Stubbs, Laurie Kemble, Danielle Beckham                                                                                                                                                                                                             |
| University of Rochester Medical Center, Rochester, New York                               | Chris Myers, Erin Licherdell, Thomas Peer, Christine Hurley, Savannah Russ, Acacia Bowden, Ellen Chinchilli, Alan Alvarado                                                                                                                                 |
| University of Washington, Seattle, Washington                                             | Layla Anderson, Megan Fuentes, Alison Zelikoff, John B. Lynch                                                                                                                                                                                              |
| Valleywise Health Medical Center, Phoenix, Arizona                                        | Jennifer Smith                                                                                                                                                                                                                                             |
